# Supplementary material
Source: PubMed Central journal article supplement (PMC5740621)
Supplement: pnas.1711467114.sapp.pdf [file pnas.1711467114.sapp.pdf]

13 **METHODS**

14 **Purification of SpoIVFB and SpoIVFB A12.** Cells were harvested and resuspended in 40 mL  
15 lysis buffer. The His-tagged proteins were purified as described (1) with the following  
16 modifications. The membrane pellet was resuspended in 40 mL detergent buffer, rotated 1 h at  
17 4°C to allow membrane solubilization, and centrifuged at  $150,000 \times g$  for 75 min at 12°C. The  
18 supernatant was added to 1 mL Talon superflow metal affinity resin that had been equilibrated  
19 with PBS containing 1% sarkosyl and 0.5% DM. The mixture was rotated at room temperature  
20 for 1 h. The cobalt resin was sedimented by centrifugation at  $708 \times g$  for 2 min at 4°C, then the  
21 resin was washed with 5 mL each of PBS containing 150 mM NaCl and 10% glycerol plus first  
22 0.3% sarkosyl and 0.3% DM, second 0.3% DM, and third 0.3 % DM and 20 mM imidazole. The  
23 resin was eluted with 3 mL PBS containing 150 mM NaCl, 10 % glycerol, 0.3% DM, and 400  
24 mM imidazole. The eluted material was concentrated to 0.5 mL using an Amicon Ultra  
25 centrifugal filter device with a 10-kDa cut-off (Millipore). The sample was loaded onto a 1.0 cm  
26  $\times$  30 cm Superdex 200 gel filtration column (GE Healthcare) that had been equilibrated with  
27 PBS containing 150 mM NaCl, 5% glycerol, and 0.3% DM. The column was eluted with the  
28 same buffer at 0.5 mL/min and 0.5-mL fractions were collected. Samples were subjected to  
29 SDS/PAGE, the gel was stained with Coomassie blue, and 3-4 fractions containing the most  
30 SpoIVFB were combined, concentrated to 0.5 mL as described above, and stored at -80°C.

31

32 **Purification of the SpoIVFB·Pro- $\sigma^K$  Complex.** Cells (7.5 g) were resuspended in 40 mL lysis  
33 buffer. The His-tagged complex was purified as described (2) with the following modifications.  
34 The membrane pellet was resuspended in 40 mL PBS containing 1 mM Pefabloc SC, 5 mM 2-  
35 mercaptoethanol, 10% glycerol, and 1% *n*-dodecyl- $\beta$ -D-maltoside (DDM) (Anatrace), rotated 1

36 h at 4°C to allow membrane solubilization, and centrifuged at 150,000 × g for 75 min at 12°C.  
37 The supernatant was added to 1 mL Talon superflow metal affinity resin that had been  
38 equilibrated with PBS containing 0.1% DDM, 5 mM 2-mercaptoethanol, and 10% glycerol. The  
39 mixture was rotated for 1 h at room temperature. The cobalt resin was sedimented by  
40 centrifugation at 708 × g for 2 min at 4°C, then the resin was washed twice with 5 mL  
41 equilibration buffer and once with 5 mL PBS containing 150 mM NaCl, 10% glycerol, 0.1%  
42 DDM, and 40 mM imidazole. The resin was eluted with 3 mL of PBS containing 150 mM NaCl,  
43 10% glycerol, 0.1% DDM, and 400 mM imidazole. The eluted material was concentrated to 0.5  
44 mL and loaded onto a gel filtration column as described above except 0.02% DDM was  
45 substituted for 0.3% DM in the column buffer. The column was eluted at 0.5 mL/min and 0.5-  
46 mL fractions were collected. Samples were subjected to SDS/PAGE, the gel was stained with  
47 Coomassie blue, and 3-4 fractions containing the most SpoIVFB and Pro-σ<sup>K</sup> were combined,  
48 concentrated to 0.5 mL as described above, and stored at -80°C.

49

50 **In-gel Protease Digestion and Peptide Purification.** Cross-linked products were digested in-  
51 gel as described (3) with the following modifications. Gel bands were dehydrated using 100%  
52 acetonitrile and incubated with 10 mM DTT in 100 mM ammonium bicarbonate, pH~8, at 56°C  
53 for 45 min, dehydrated again and incubated in the dark with 50 mM iodoacetamide in 100 mM  
54 ammonium bicarbonate for 20 min. Gel bands were then washed with ammonium bicarbonate  
55 and dehydrated again. Sequencing-grade modified trypsin or chymotrypsin was prepared at 0.01  
56 ug/uL in 50 mM ammonium bicarbonate and ~50 uL of this was added to each gel band so that  
57 the gel was completely submerged. Bands were then incubated at 37°C overnight. Peptides  
58 were extracted from the gel by water bath sonication in a solution of 60% ACN/1% TCA and

59 vacuum dried to ~2 uL. Peptides were then resuspended in 2% acetonitrile/0.1% TFA to 25 uL.  
60 From this, 5 uL was automatically injected by a Thermo EASYnLC 1000 onto a Thermo  
61 Acclaim PepMap RSLC 0.075 mm x 150 mm C18 column and eluted over 60 min with a  
62 gradient of 2% buffer B to 30% buffer B in 49 min, ramping to 100% buffer B at 50 min and  
63 held at 100% buffer B for the duration of the run (buffer A = 99.9% water/0.1% formic acid and  
64 buffer B = 99.9% acetonitrile/0.1% formic acid).

65

66 **Mass Spectrometry and Data Analysis.** Eluted peptides were sprayed into the mass  
67 spectrometer using a FlexSpray ion source. Survey scans were obtained in the Orbi trap (70,000  
68 resolution, determined at m/z 200) and the top ten ions in each survey scan were then subjected  
69 to automatic higher-energy collisional dissociation (HCD) with fragment spectra acquired at  
70 17,500 resolution. The resulting MS/MS spectra were converted to peak lists using Mascot  
71 Distiller v2.5.1.0 ([www.matrixscience.com](http://www.matrixscience.com)) and searched using the Mascot searching algorithm  
72 v2.4, against a protein database containing the target protein sequences with *E. coli* protein  
73 sequences (both downloaded from NCBI, [www.ncbi.nlm.nih.gov](http://www.ncbi.nlm.nih.gov)) for background and appended  
74 with common laboratory contaminants. The Mascot output was then analyzed using Scaffold  
75 v4.3.4 ([www.proteomesoftware.com](http://www.proteomesoftware.com)) to probabilistically validate protein identifications.  
76 Assignments validated using the Scaffold 1% false discovery rate confidence filter were  
77 considered true. For cross-link assignments, remaining unmatched spectra from the initial  
78 Mascot analyses were exported from Scaffold as processed peak lists and searched against the  
79 target protein sequences and common laboratory contaminants using StavroX (4).

80

81 **Modeling of the SpoIVFB·Pro- $\sigma^K$  complex.** The N-terminal membrane domain of SpoIVFB  
82 (residues 1-209) was modeled by homology using the mjs2P structure (PDB code: 3B4R) as a  
83 template (22% sequence identity and E-value of  $5.6 \cdot 10^{-29}$ ) (5). MODELLER (6) was used in  
84 conjunction with the MMTSB Tool Set (7). The crystal structure contains two chains that differ  
85 in their conformations (5). The A chain is more open towards the active site and has a more  
86 ordered C-terminal helix. The B chain is more closed and exhibits more disorder towards the  
87 end of the C-terminal helix. Models for SpoIVFB were built based on both chains. The tetramer  
88 that was ultimately built consisted of two subunits based on the A structure (called chains A and  
89 C in the model), presumed to be able to bind to Pro- $\sigma^K$ , and two subunits based on the B  
90 structure (called chains B and D), presumed to be substrate-free, in order to be consistent with  
91 experimental evidence that a catalytically-inactive SpoIVFB tetramer complexes with only two  
92 bound Pro- $\sigma^K$  substrates (called chains X and Y in the model) (2).

93 The mjs2P crystallographic dimer places the C-termini of each subunit opposite of each  
94 other (5). However, this antiparallel arrangement is not compatible with experimental data for  
95 the membrane topology of SpoIVFB (8) and would not allow tetramerization of the C-terminal  
96 CBS domains since only two subunits each would be on either side of the membrane. Therefore,  
97 one of the SpoIVFB N-terminal domains was rotated to a parallel orientation followed by  
98 rotation around the  $z$ -axis to build a dimer with approximate shape complementarity. A tetramer  
99 was subsequently built by rotating the initial dimer around the  $z$ -axis, the membrane normal, by  
100  $180^\circ$  followed by translation along the  $x$ - and  $y$ -axes until overlap of the two dimers was avoided.  
101 Care was taken to have all four active sites face outwards since otherwise Pro- $\sigma^K$  binding and  
102 product release would be impossible or seriously hindered. The goal of this initial step was to  
103 place the SpoIVFB N-terminal domains at reasonable initial positions but with extra distance to

104 obtain an initial conformation that could be refined further. The initial model was reduced to C $\alpha$   
105 positions and subjected to molecular dynamics simulations. The C $\alpha$ -based model consisted of  
106 harmonic bonds between subsequent residues to maintain a distance of 3.8 Å in addition to a  
107 Lennard-Jones potential (radius 3.5 Å) to avoid overlap of C $\alpha$  particles. Harmonic restraints  
108 were applied to keep each of the subunits rigid, minimize the distance between the centers of  
109 mass of each subunit, and maintain each subunit to be aligned with the membrane normal and  
110 centered around  $z=0$ . The restrained simulations were repeated many times with different initial  
111 velocity distributions. The resulting structures were clustered based on overall RMSD. Eight  
112 clusters were identified with populations of 268, 250, 131, 112, 76, 70, 62, and 21 elements. The  
113 representative structure from the most populated cluster was selected as a likely tetrameric  
114 model. We note that the representative structure of the second-largest cluster was only 3 Å from  
115 the selected model while the largest deviation was found for the representative structure of the  
116 smallest cluster with about 5 Å. Therefore, the subsequent modeling is not expected to be  
117 especially sensitive to the selected cluster.

118 The C-terminal domain of SpoIVFB (residues 214-279) is homologous to a single CBS  
119 domain (9). Available structures feature CBS domains either as dimers or as disc-like tetramers.  
120 There are two major tetramer configurations, only one of which is fully compatible with an N-  
121 terminal tetramer consisting of four membrane-bound subunits on one side of the disc-like  
122 structure. An example of this configuration is given by the CBS-domain protein TM0935 from  
123 *Thermotoga maritima* (PDB code: 1O50) (10), which was used as the structure template for  
124 building a tetramer for the C-terminal part of SpoIVFB (13% sequence identity and E-value of  
125  $5.6 \times 10^{-5}$ ).

126 The SpoIVFB model was completed by first positioning the C-terminal tetrameric CBS disc  
127 beneath the N-terminal membrane-localized tetramer. Flexible linkers for residues 210-213 were  
128 then added to connect both sections of SpoIVFB.

129 To model Pro- $\sigma^K$ , the structure of the RNA-polymerase sigma subunit domain 2 from  
130 *Thermus aquaticus* (PDB code: 3UGO) (11) was used as the template to build a structure for  
131 residues 34-106 of Pro- $\sigma^K$  (40% sequence identity and E-value of  $1.2 \times 10^{-10}$ ). The missing N-  
132 terminal residues 1-33 were added as an extended chain since structural information is not  
133 available for the Pro sequence. The exact positioning of Pro- $\sigma^K$  with respect to SpoIVFB is  
134 unclear and in an initial model two copies of Pro- $\sigma^K$  were placed near the A and C chains of  
135 SpoIVFB outside the membrane plane and with the N-terminus oriented towards the protease  
136 active site.

137 The modeling described above only resulted in a very approximate initial model since the  
138 tetramerization interface of the SpoIVFB membrane domains, the interaction of the SpoIVFB  
139 membrane domains and CBS domains, and the interaction of SpoIVFB with Pro- $\sigma^K$  were  
140 unclear. Constraints from cross-linking experiments were used to further refine the initial model  
141 via molecular dynamics simulations of a coarse-grained representation (only C $\alpha$  positions) in the  
142 presence of various restraint potentials that are detailed in the following:

- 143 1. The membrane domains (residues 1-200) of the two Pro- $\sigma^K$ -binding SpoIVFB chains A  
144 and C were harmonically restrained to their initial position (using a force constant of 2.0  
145 kcal/mol/Å<sup>2</sup>). This restraint anchors the membrane domains in space.
- 146 2. The membrane domains of SpoIVFB chains B and D were restrained with respect to their  
147 overall structure (using a force constant of 4.0 kcal/mol/ Å<sup>2</sup>) but not fixed in space, to  
148 allow for some flexibility in adjusting the initial tetramer model to the presence of the

149 CBS domains and Pro- $\sigma^K$ . Additional restraints between the active sites of different  
150 chains and between residues at the ‘top’ of the tetramer (opposite the CBS domain) kept  
151 chains B and D close to the initial tetramer model since there are no other forces in the  
152 modeling protocol that would keep SpoIVFB subunits together or in the membrane  
153 otherwise.

154 3. The tetrameric CBS domains of SpoIVFB (residues 220-272) were restrained together to  
155 maintain their internal tetrameric structure (using a force constant of 2.0 kcal/mol/Å<sup>2</sup>)  
156 while allowing only rigid body motions of the entire tetramer.

157 4. The interdomain linkers of SpoIVFB (residues 201-219) were fully flexible.

158 5. The two Pro- $\sigma^K$  chains X and Y were restrained to maintain their internal structure for  
159 parts of the template-based model (residues 38-122 and residues 29-37 using a force  
160 constant of 5.0 kcal/mol/Å<sup>2</sup>) allowing for free sampling of the helix from 29-37 relative  
161 to the rest of the model and a fully flexible N-terminus.

162 6. Cross-linking data was incorporated in the form of flat-bottom potentials typically used  
163 for NOE restraints. Table S3 gives the restraints that were implemented and their  
164 distance ranges.

165 7. Residues H43, H47, and D137 of SpoIVFB were restrained to bind a zinc ion at the  
166 active site and residue E44 was restrained to be able to activate a water molecule to  
167 cleave the peptide bond between residues S21 and Y22 of Pro- $\sigma^K$  (12-14).

168 8. SpoIVFB chains A and C interact with Pro- $\sigma^K$  chains X and Y, respectively. No  
169 restraints were applied between SpoIVFB chains B and D, and Pro- $\sigma^K$ . Also, no  
170 restraints were applied between SpoIVFB chains except the weak restraints mentioned  
171 above to maintain the overall tetramer. The restraints on the SpoIVFB interdomain linker



172 (residues 200-220) from cross-linking data were not applied uniformly to all chains  
173 because the CBS domain tetramer orientation requires a more extended linker for the B  
174 and D chains in order to satisfy the restraints for the A and C chains (Table S2).

175 Using these restraints models were initially minimized for 1,000 steps using an adopted-basis  
176 Newton-Raphson scheme. Subsequently, 50,000 steps of molecular dynamics were carried out  
177 at 1,000 K in an NVT ensemble followed by another round of minimization over 100,000 steps.  
178 The temperature was maintained by periodically reassigning velocities and an integration time  
179 step of 2 fs was used. In the C $\alpha$ -based model, bonds between adjacent beads were harmonically  
180 restrained to 3.8 Å using a force constant of 100 kcal/mol/Å<sup>2</sup>. Hydrophobic (Ile, Leu, Phe, Trp,  
181 Gly, Pro, Val, Met, Cys, Ala) and polar (Lys, Arg, Asp, Glu, Ser, Thr, His, Tyr, Gln, Asn) beads  
182 were distinguished by different Lennard-Jones parameters with  $\epsilon=0.05$  for polar residues and  
183  $\epsilon=0.2$  for hydrophobic residues.  $R_{\min}$  was set to 3.7 Å for both types of beads. A charge of -0.1  
184 was applied to acidic residues and a charge of 0.1 to basic residues. All beads had a mass of 50  
185 amu. Non-bonded interactions were switched to zero between 16 and 18 Å and a non-bonded  
186 list cutoff of 20 Å was applied. While zinc was not present in the initial modeling, it was  
187 included in the restraint-based optimization of the complete C $\alpha$ -based model to facilitate later  
188 conversion to an atomistic model. To hold the zinc atom in place, it was tethered to residues 43,  
189 47, and 137 in each of the four subunits at distances of 6.4, 6.4, and 4.8 Å using harmonic  
190 restraints with a force constant of 1.0 kcal/mol based on the position of the Zn ion in the mjs2P  
191 template structure relative to the C $\alpha$  atoms. The minimization-MD-minimization protocol was  
192 repeated 100 times but because of the restraints the structure varied little (within 2-4 Å RMSD  
193 over the entire complex) with most of the variation involving the (unrestrained) N-terminus of  
194 Pro- $\sigma^K$  and the linker between the membrane and CBS domains of SpoIVFB (see Fig. S12). The

195 variation in the models was well within the expected overall accuracy of the model (about 5 Å)  
196 and a representative structure was selected as the final model for further analysis.

197 The final model was then reconstructed to atomistic detail using the MMTSB Tool Set (7).

198

## 199 REFERENCES

- 200 1. Zhou R, Cusumano C, Sui D, Garavito RM, & Kroos L (2009) Intramembrane proteolytic  
201 cleavage of a membrane-tethered transcription factor by a metalloprotease depends on ATP.  
202 *Proc. Natl. Acad. Sci. USA* 106:16174-16179.
- 203 2. Zhang Y, *et al.* (2016) Complex formed between intramembrane metalloprotease SpoIVFB  
204 and its substrate, Pro- $\sigma^K$ . *J. Biol. Chem.* 291:10347-10362.
- 205 3. Shevchenko A, Wilm M, Vorm O, & Mann M (1996) Mass spectrometric sequencing of  
206 proteins silver-stained polyacrylamide gels. *Anal. Chem.* 68(5):850-858.
- 207 4. Götze M, *et al.* (2012) StavroX - a software for analyzing crosslinked products in protein  
208 interaction studies. *J. Am. Soc. Mass Spectrom.* 23:76-87.
- 209 5. Feng L, *et al.* (2007) Structure of a site-2 protease family intramembrane metalloprotease.  
210 *Science* 318(5856):1608-1612.
- 211 6. Sali A & Blundell TL (1993) Comparative protein modelling by satisfaction of spatial  
212 restraints. *J. Mol. Biol.* 234(3):779-815.
- 213 7. Feig M, Karanicolas J, & Brooks CL, 3rd (2004) MMTSB Tool Set: enhanced sampling and  
214 multiscale modeling methods for applications in structural biology. *J. Mol. Graph Model*  
215 22(5):377-395.
- 216 8. Green D & Cutting S (2000) Membrane topology of the *Bacillus subtilis* Pro- $\sigma^K$  processing  
217 complex. *J. Bacteriol.* 182:278-285.

- 218 9. Kinch LN, Ginalski K, & Grishin NV (2006) Site-2 protease regulated intramembrane  
219 proteolysis: sequence homologs suggest an ancient signaling cascade. *Protein Sci.* 15(1):84-  
220 93.
- 221 10. Miller MD, *et al.* (2004) Crystal structure of a tandem cystathionine- $\beta$ -synthase (CBS)  
222 domain protein (TM0935) from *Thermotoga maritima* at 1.87 Angstrom resolution. *Proteins*  
223 57(1):213-217.
- 224 11. Feklistov A & Darst SA (2011) Structural basis for promoter-10 element recognition by the  
225 bacterial RNA polymerase sigma subunit. *Cell* 147(6):1257-1269.
- 226 12. Kroos L, Kunkel B, & Losick R (1989) Switch protein alters specificity of RNA polymerase  
227 containing a compartment-specific sigma factor. *Science* 243:526-529.
- 228 13. Rudner D, Fawcett P, & Losick R (1999) A family of membrane-embedded  
229 metalloproteases involved in regulated proteolysis of membrane-associated transcription  
230 factors. *Proc. Natl. Acad. Sci. USA* 96:14765-14770.
- 231 14. Yu Y-TN & Kroos L (2000) Evidence that SpoIVFB is a novel type of membrane  
232 metalloprotease governing intercompartmental communication during *Bacillus subtilis*  
233 sporulation. *J. Bacteriol.* 182:3305-3309.
- 234 15. Zhou R & Kroos L (2004) BofA protein inhibits intramembrane proteolysis of pro- $\sigma^K$  in an  
235 intercompartmental signaling pathway during *Bacillus subtilis* sporulation. *Proc. Natl.*  
236 *Acad. Sci. USA* 101(17):6385-6390.
- 237 16. Kunkel B, Sandman K, Panzer S, Youngman P, & Losick R (1988) The promoter for a  
238 sporulation gene in the *spoIVC* locus of *Bacillus subtilis* and its use in studies of temporal  
239 and spatial control of gene expression. *J. Bacteriol.* 170:3513-3522.

240 17. Kunkel B, Kroos L, Poth H, Youngman P, & Losick R (1989) Temporal and spatial control  
241 of the mother-cell regulatory gene *spoIIID* of *Bacillus subtilis*. *Genes Dev.* 3:1735-1744.

242

**Table S1 Chemically Cross-linked Peptides of the SpoIVFB-Pro- $\sigma^k$  Complex**

| <b>Cross-links between SpoIVFB and Pro-<math>\sigma^k</math></b> |                              |                                  |                   |                         |                    |                              |                     |                   |                |
|------------------------------------------------------------------|------------------------------|----------------------------------|-------------------|-------------------------|--------------------|------------------------------|---------------------|-------------------|----------------|
| Cross-linker <sup>a</sup>                                        | SpoIVFB Peptide <sup>b</sup> | Pro- $\sigma^k$ Peptide          | SpoIVFB Residue   | Pro- $\sigma^k$ Residue | Score <sup>c</sup> | Deviation (ppm) <sup>d</sup> | Charge <sup>e</sup> | Mass <sup>f</sup> | Times Observed |
| DSS                                                              | <u>I</u> KR                  | <u>K</u> FENTGEDAEDLISIGTIGLIK   | K59               | K69                     | 322                | -0.51                        | 3                   | 2917              | 3              |
| BS3                                                              | <u>I</u> KR                  | <u>K</u> FENTGEDAEDLISIGTIGLIK   | K59               | K69                     | 295                | -0.8                         | 3                   | 2917              | 2              |
| AMAS                                                             | <u>C</u> R                   | LVAHIV <u>K</u> K                | C201 <sup>g</sup> | K68 or K69              | 66                 | 0.16                         | 3                   | 1322              | 2              |
| DSS                                                              | YYG <u>K</u> NR              | YLELMA <u>K</u> GDEHAR           | K217              | K46                     | 252                | -4.88                        | 3                   | 2470              | 1              |
| DSS                                                              | YYG <u>K</u> NR              | <u>K</u> YLELMAK                 | K217              | K39                     | 116                | -3.03                        | 2                   | 1933              | 1              |
| DSS                                                              | YYG <u>K</u> NR              | <u>K</u> YLELMAKGDEHAR           | K217              | K39                     | 83                 | -3.34                        | 3                   | 2598              | 1              |
| Sulfo-SMCC                                                       | <u>G</u> CK                  | NNAFPQPLSSEE <u>K</u> KYLELMAK   | C246              | K38 or K39              | 71                 | -1.44                        | 4                   | 3050              | 1              |
| Sulfo-SMCC                                                       | <u>G</u> CK                  | <u>K</u> FENTGEDAEDLISIGTIGLIK   | C246              | K69                     | 395                | -2.46                        | 3                   | 2888              | 3              |
| Sulfo-SMCC                                                       | <u>G</u> CK                  | GIESYSAG <u>K</u> GTK            | C246              | K99                     | 86                 | -1.31                        | 3                   | 1723              | 1              |
| Sulfo-SMCC                                                       | <u>G</u> CK                  | GT <u>K</u> LATYAAR              | C246              | K102                    | 75                 | -1.59                        | 2                   | 1577              | 1              |
| BM(PEG) <sub>2</sub>                                             | <u>G</u> CK                  | <u>C</u> IENEILMHLR              | C246              | C110                    | 85                 | -0.81                        | 3                   | 2001              | 4              |
| <b>Cross-links within SpoIVFB</b>                                |                              |                                  |                   |                         |                    |                              |                     |                   |                |
| Cross-linker                                                     | Peptide 1                    | Peptide 2                        | Residue 1         | Residue 2               | Score              | Deviation (ppm)              | Charge              | Mass              | Times Observed |
| DTSSP                                                            | MNKWLDLIL <u>K</u>           | NRELE <u>K</u>                   | K10 <sup>h</sup>  | K223                    | 81                 | -4.47                        | 3                   | 2235              | 2              |
| Sulfo-SMCC                                                       | QLPFQ <u>K</u> AHR           | <u>G</u> CK                      | K154              | C246                    | 81                 | -1.02                        | 4                   | 1650              | 2              |
| AMAS                                                             | QLPFQ <u>K</u> AHR           | <u>C</u> RHYIHVR                 | K154              | C201 <sup>g</sup>       | 21                 | -3.29                        | 3                   | 2344              | 1              |
| DSS                                                              | YYG <u>K</u>                 | NRELE <u>K</u>                   | K217              | K223                    | 173                | -3.88                        | 3                   | 1456              | 1              |
| DSS                                                              | YYG <u>K</u> NR              | ELE <u>K</u>                     | K217              | K223                    | 72                 | -3.88                        | 3                   | 1456              | 1              |
| Sulfo-SMCC                                                       | YYG <u>K</u> NR              | <u>G</u> CK                      | K217              | C246                    | 86                 | -1.05                        | 2                   | 1326              | 3              |
| BS3                                                              | YYG <u>K</u>                 | LLPLTVKAEDKVYHVMAEFKRGB <u>K</u> | K217              | K247                    | 66                 | 1.23                         | 3                   | 3516              | 1              |
| DSS                                                              | ELE <u>K</u> LLPLTVK         | AEDKVYHVMAEF <u>K</u> R          | K223              | K243                    | 86                 | -0.83                        | 4                   | 3143              | 2              |
| DSS                                                              | ELE <u>K</u> LLPLTVK         | VYHVMAEF <u>K</u> R              | K223              | K243                    | 75                 | -4.7                         | 4                   | 2716              | 1              |
| Sulfo-SMCC                                                       | ELE <u>K</u> LLPLTVK         | <u>G</u> CK                      | K223              | C246                    | 733                | -1.7                         | 2                   | 1808              | 10             |
| Sulfo-SMCC                                                       | NRELE <u>K</u> LLPLTVK       | <u>G</u> CK                      | K223              | C246                    | 97                 | -1.35                        | 4                   | 2078              | 1              |
| DSS                                                              | ELE <u>K</u> LLPLTVK         | SGQ <u>K</u> LSQLDENEVLHAYFADKR  | K223              | K258                    | 331                | -4.33                        | 4                   | 3968              | 3              |
| BS3                                                              | LLPLTV <u>K</u>              | AED <u>K</u>                     | K230              | K234                    | 66                 | -0.25                        | 2                   | 1383              | 1              |
| Sulfo-SMCC                                                       | LLPLTV <u>K</u> AEDK         | <u>G</u> CK                      | K230              | C246                    | 139                | -1.98                        | 3                   | 1752              | 3              |

| Sulfo-SMCC                                  | AEDK <b>V</b> YHVMAEFK              | <b>G</b> <u>C</u> K                     | K234       | C246         | 129   | -1.56           | 4      | 2248 | 3              |
|---------------------------------------------|-------------------------------------|-----------------------------------------|------------|--------------|-------|-----------------|--------|------|----------------|
| Sulfo-SMCC                                  | AEDK <b>V</b> YHVMAEFKR             | <b>G</b> <u>C</u> K                     | K234       | C246         | 64    | 0.98            | 4      | 2264 | 1              |
| Sulfo-SMCC                                  | <b>G</b> <u>C</u> K                 | HPIII <b>E</b> K <b>S</b> G <b>Q</b> K  | C246       | K254 or K258 | 277   | -2.77           | 2      | 1775 | 9              |
| Sulfo-SMCC                                  | <b>G</b> <u>C</u> K                 | SG <b>Q</b> <b>K</b> LSQLDENEVLHAYFADKR | C246       | K258         | 220   | -2.46           | 4      | 3074 | 2              |
| Sulfo-SMCC                                  | <b>G</b> <u>C</u> KHPIII <b>E</b> K | SG <b>Q</b> <b>K</b>                    | C246       | K258         | 62    | -3.21           | 2      | 1775 | 2              |
| Sulfo-SMCC                                  | RG <b>CK</b>                        | LSQLDENEVLHAYFAD <b>K</b>               | C246       | K275         | 91    | -4.26           | 3      | 2673 | 2              |
| Sulfo-SMCC                                  | <b>G</b> <u>C</u> K                 | LSQLDENEVLHAYFAD <b>K</b> R             | C246       | K275         | 85    | -4.26           | 3      | 2673 | 2              |
| BS3                                         | HPIII <b>E</b> K                    | SG <b>Q</b> <b>K</b>                    | K254       | K258         | 66    | -0.41           | 2      | 1406 | 3              |
| <b>Cross-links within Pro-σ<sup>k</sup></b> |                                     |                                         |            |              |       |                 |        |      |                |
| Cross-linker                                | Peptide 1                           | Peptide 2                               | Residue 1  | Residue 2    | Score | Deviation (ppm) | Charge | Mass | Times Observed |
| DSS                                         | NNAFPQPLSS <b>E</b> E <b>K</b>      | KYLELMA <b>K</b> GDEHAR                 | K38        | K46          | 258   | -1.82           | 4      | 3362 | 1              |
| DSS                                         | NNAFPQPLSS <b>E</b> E <b>K</b>      | KYLELMA <b>K</b>                        | K38        | K46          | 66    | -2.13           | 2      | 2680 | 1              |
| DSS                                         | NNAFPQPLSS <b>E</b> E <b>K</b> K    | YLELMA <b>K</b> GDEHAR                  | K38 or K39 | K46          | 257   | -1.82           | 4      | 3362 | 1              |
| BS3                                         | NNAFPQPLSS <b>E</b> E <b>K</b> K    | YLELMA <b>K</b> GDEHAR                  | K38 or K39 | K46          | 89    | -0.28           | 4      | 3346 | 2              |
| DSS                                         | NNAFPQPLSS <b>E</b> E <b>K</b> K    | YLELMA <b>K</b>                         | K38 or K39 | K46          | 66    | -2.13           | 2      | 2680 | 1              |
| DTSSP                                       | NNAFPQPLSS <b>E</b> E <b>K</b> K    | <b>K</b> FENTGEDAEDLISIGTIGLIK          | K38 or K39 | K69          | 146   | -4.87           | 4      | 4212 | 1              |
| DSS                                         | NNAFPQPLSS <b>E</b> E <b>K</b> K    | GIESYSAG <b>K</b> G <b>T</b> K          | K38 or K39 | K99          | 458   | -3.43           | 3      | 3010 | 1              |
| BS3                                         | NNAFPQPLSS <b>E</b> E <b>K</b> K    | GT <b>K</b> LATYAAR                     | K38 or K39 | K102         | 534   | -0.34           | 3      | 2864 | 9              |
| DSS                                         | NNAFPQPLSS <b>E</b> E <b>K</b> K    | GT <b>K</b> LATYAAR                     | K38 or K39 | K102         | 126   | -2.06           | 4      | 2864 | 1              |
| Sulfo-SMCC                                  | NNAFPQPLSS <b>E</b> E <b>K</b> K    | <b>C</b> IENEILMHLR                     | K38 or K39 | C110         | 342   | -2.17           | 3      | 3281 | 1              |
| DSS                                         | <b>K</b> FENTGEDAEDLISIGTIGLIK      | GT <b>K</b> LATYAAR                     | K69        | K102         | 306   | -0.8            | 4      | 3552 | 3              |
| BS3                                         | <b>K</b> FENTGEDAEDLISIGTIGLIK      | GT <b>K</b> LATYAAR                     | K69        | K102         | 109   | 0.76            | 4      | 3552 | 1              |
| Sulfo-SMCC                                  | GIESYSAG <b>K</b> G <b>T</b> K      | <b>C</b> IENEILMHLR                     | K99        | C110         | 152   | -1.31           | 4      | 2802 | 18             |
| Sulfo-SMCC                                  | GT <b>K</b> LATYAAR                 | <b>C</b> IENEILMHLR                     | K102       | C110         | 140   | -1.53           | 3      | 2656 | 8              |

<sup>a</sup>Cross-linker abbreviations: disuccinimidyl suberate, DSS; bis(sulfosuccinimidyl)suberate, BS3; *N*-( $\alpha$ -maleimidoacetoxy)succinimide ester, AMAS; sulfosuccinimidyl-4-(*N*-maleimidomethyl)cyclohexane-1-carboxylate, SMCC; 1,8-bismaleimidodiethyleneglycol, BM(PEG)<sub>2</sub>; 3,3'-dithiobis(sulfosuccinimidylpropionate), DTSSP

<sup>b</sup>Cross-linked residues are bold underlined. In some cases, the mass spectrometry data did not allow a distinction to be made between adjacent or nearby residues participating in the cross-link.

<sup>c</sup>Maximum score observed for the cross-link. Scores are calculated by comparing the MS/MS-spectrum with theoretical fragment ions using StavroX software.

<sup>d</sup>Deviation of theoretical and measured mass.

<sup>e</sup>Charge of the precursor.

<sup>f</sup>Singly charged, monoisotopic mass of the precursor.

<sup>g</sup>This cross-link was observed using SpoIVFB with a Q201C substitution.

<sup>h</sup>This cross-link implied a constraint used to build initial models, but the models violated this constraint by large values, so this constraint was not used to build the reported model. We speculate that this cross-link occurred in unfolded SpoIVFB.

**Table S2 Summary of Chemical Cross-links**

| <b>Chemical cross-links between SpoIVFB and Pro-<math>\sigma^K</math></b> |                         |                            |                |                                                 |
|---------------------------------------------------------------------------|-------------------------|----------------------------|----------------|-------------------------------------------------|
| SpoIVFB Residue                                                           | Pro- $\sigma^K$ Residue | Highest Score <sup>a</sup> | Times Observed | Average Violation ( $\text{\AA}$ ) <sup>b</sup> |
| K59                                                                       | K69                     | 322                        | 5              | 0.1                                             |
| C201                                                                      | K68 or K69              | 66                         | 2              | 0                                               |
| K217                                                                      | K46                     | 252                        | 1              | 0.1                                             |
| K217                                                                      | K39                     | 116                        | 2              | 0                                               |
| C246                                                                      | K38                     | 71                         | 1              | 0                                               |
| C246                                                                      | K69                     | 395                        | 3              | 0.5                                             |
| C246                                                                      | K99                     | 86                         | 1              | 0                                               |
| C246                                                                      | K102                    | 75                         | 1              | 1.1                                             |
| C246                                                                      | C110                    | 85                         | 4              | 0                                               |

| <b>Cross-links within SpoIVFB</b> |           |               |                |                                    |
|-----------------------------------|-----------|---------------|----------------|------------------------------------|
| Residue 1                         | Residue 2 | Highest Score | Times Observed | Average Violation ( $\text{\AA}$ ) |
| K154                              | C246      | 81            | 2              | 2.0 <sup>c</sup>                   |
| K154                              | C201      | 21            | 1              | 1.2 <sup>d</sup>                   |
| K217                              | K223      | 173           | 2              | 0 <sup>c</sup>                     |
| K217                              | C246      | 86            | 3              | 0 <sup>c</sup>                     |
| K217                              | K247      | 66            | 1              | 0.2 <sup>c</sup>                   |
| K223                              | K243      | 86            | 3              | 1.6                                |
| K223                              | C246      | 733           | 11             | 0.2                                |
| K223                              | K258      | 331           | 3              | 0.2                                |
| K230                              | K234      | 66            | 1              | 0                                  |
| K230                              | C246      | 139           | 3              | 0.6                                |
| K234                              | C246      | 129           | 4              | 0.8                                |
| C246                              | K254      | 277           | 9              | 0.6                                |
| C246                              | K258      | 220           | 4              | 1.3                                |
| C246                              | K275      | 91            | 4              | 0.4                                |
| K254                              | K258      | 66            | 3              | 0                                  |

| <b>Cross-links within Pro-<math>\sigma^K</math></b> |           |               |                |                                    |
|-----------------------------------------------------|-----------|---------------|----------------|------------------------------------|
| Residue 1                                           | Residue 2 | Highest Score | Times Observed | Average Violation ( $\text{\AA}$ ) |
| K38                                                 | K46       | 258           | 2              | 0                                  |
| K38 or K39                                          | K46       | 257           | 4              | 0                                  |
| K38                                                 | K69       | 146           | 1              | 0                                  |
| K38 or K39                                          | K99       | 458           | 1              | 0.4                                |
| K39                                                 | K102      | 534           | 10             | 0                                  |
| K38                                                 | C110      | 342           | 1              | 0                                  |
| K69                                                 | K102      | 306           | 4              | 0.1                                |
| K99                                                 | C110      | 152           | 18             | 0                                  |
| K102                                                | C110      | 140           | 8              | 0.3                                |



<sup>a</sup>Maximum score observed for the cross-link. Scores are calculated by comparing the MS/MS-spectrum with theoretical fragment ions using StavroX software.

<sup>b</sup>The distance between C $\alpha$  atoms of cross-linked residues in the model (average of A, B, C, and D chains for SpoIVFB and average of X and Y chains for Pro- $\sigma^k$ , unless noted otherwise) minus the theoretical maximum distance for the cross-linker, with negative values reported as 0.

<sup>c</sup>Since this restraint was applied only to the A and C chains, the average violation is reported only for those chains.

<sup>d</sup>Since this restraint was applied only to the B and D chains, the average violation is reported only for those chains.

**Table S3 Cross-linking Restraints Used in Modeling and Violations of the SpoIVFB-Pro- $\sigma^K$  Complex Model**

| Cross-links between SpoIVFB and Pro- $\sigma^K$ |                           |                     |                                |                                |                              |                       |                            |
|-------------------------------------------------|---------------------------|---------------------|--------------------------------|--------------------------------|------------------------------|-----------------------|----------------------------|
| Residues <sup>a</sup>                           | Cross-linker <sup>b</sup> | Observed cross-link | Minimum distance restraint (Å) | Maximum distance restraint (Å) | K (kcal/mol/Å <sup>2</sup> ) | Distance in model (Å) | Violation (Å) <sup>c</sup> |
| PROA 44 - PROX 18                               | disulfide                 | weak                | 3                              | 9                              | 5                            | 8.4                   | 0                          |
| PROA 44 - PROX 19                               | disulfide                 |                     | 3                              | 7                              | 5                            | 10.8                  | 3.8                        |
| PROA 44 - PROX 20                               | disulfide                 |                     | 3                              | 7                              | 5                            | 8.7                   | 1.7                        |
| PROA 44 - PROX 22                               | disulfide                 |                     | 3                              | 7                              | 5                            | 8.3                   | 1.3                        |
| PROA 44 - PROX 23                               | disulfide                 |                     | 3                              | 7                              | 5                            | 9.5                   | 2.5                        |
| PROA 44 - PROX 24                               | disulfide                 |                     | 3                              | 7                              | 5                            | 5.2                   | 0                          |
| PROA 44 - PROX 25                               | disulfide                 |                     | 3                              | 7                              | 5                            | 8.3                   | 1.3                        |
| PROA 44 - PROX 27                               | disulfide                 | no                  | 7                              | 100                            | 2                            | 12.4                  | 0                          |
| PROA 135 - PROX 20                              | disulfide                 |                     | 3                              | 7                              | 5                            | 4.9                   | 0                          |
| PROA 135 - PROX 21                              | disulfide                 |                     | 3                              | 7                              | 5                            | 7.4                   | 0.4                        |
| PROA 135 - PROX 22                              | disulfide                 |                     | 3                              | 7                              | 5                            | 8.6                   | 1.6                        |
| PROA 135 - PROX 24                              | disulfide                 |                     | 3                              | 7                              | 5                            | 9.7                   | 2.7                        |
| PROA 135 - PROX 18                              | disulfide                 | no                  | 7                              | 100                            | 2                            | 10.1                  | 0                          |
| PROA 135 - PROX 19                              | disulfide                 | no                  | 7                              | 100                            | 2                            | 5                     | 0                          |
| PROA 135 - PROX 25                              | disulfide                 | no                  | 7                              | 100                            | 2                            | 14.7                  | 0                          |
| PROA 70 - PROX 18                               | disulfide                 |                     | 3                              | 7                              | 5                            | 7.5                   | 0.5                        |
| PROA 70 - PROX 19                               | disulfide                 |                     | 3                              | 7                              | 5                            | 10.1                  | 3.1                        |
| PROA 70 - PROX 20                               | disulfide                 |                     | 3                              | 7                              | 5                            | 10.3                  | 3.3                        |
| PROA 70 - PROX 21                               | disulfide                 |                     | 3                              | 7                              | 5                            | 6.8                   | 0                          |
| PROA 70 - PROX 22                               | disulfide                 |                     | 3                              | 7                              | 5                            | 5.6                   | 0                          |
| PROA 70 - PROX 23                               | disulfide                 |                     | 3                              | 7                              | 5                            | 9                     | 2                          |
| PROA 70 - PROX 24                               | disulfide                 |                     | 3                              | 7                              | 5                            | 6                     | 0                          |
| PROA 70 - PROX 25                               | disulfide                 |                     | 3                              | 7                              | 5                            | 4.6                   | 0                          |
| PROA 70 - PROX 27                               | disulfide                 |                     | 3                              | 7                              | 5                            | 8.3                   | 1.3                        |
| PROA 70 - PROX 29                               | disulfide                 | very weak           | 5                              | 20                             | 5                            | 9.7                   | 0                          |
| PROC 44 - PROY 18                               | disulfide                 | weak                | 3                              | 9                              | 5                            | 9.4                   | 0.4                        |
| PROC 44 - PROY 19                               | disulfide                 |                     | 3                              | 7                              | 5                            | 9.1                   | 2.1                        |
| PROC 44 - PROY 20                               | disulfide                 |                     | 3                              | 7                              | 5                            | 8.8                   | 1.8                        |
| PROC 44 - PROY 22                               | disulfide                 |                     | 3                              | 7                              | 5                            | 4.8                   | 0                          |
| PROC 44 - PROY 23                               | disulfide                 |                     | 3                              | 7                              | 5                            | 8.8                   | 1.8                        |
| PROC 44 - PROY 24                               | disulfide                 |                     | 3                              | 7                              | 5                            | 9.6                   | 2.6                        |
| PROC 44 - PROY 25                               | disulfide                 |                     | 3                              | 7                              | 5                            | 7.5                   | 0.5                        |
| PROC 44 - PROY 27                               | disulfide                 | no                  | 7                              | 100                            | 2                            | 10.8                  | 0                          |
| PROC 135 - PROY 20                              | disulfide                 |                     | 3                              | 7                              | 5                            | 4.9                   | 0                          |
| PROC 135 - PROY 21                              | disulfide                 |                     | 3                              | 7                              | 5                            | 9                     | 2                          |
| PROC 135 - PROY 22                              | disulfide                 |                     | 3                              | 7                              | 5                            | 8.4                   | 1.4                        |
| PROC 135 - PROY 24                              | disulfide                 |                     | 3                              | 7                              | 5                            | 11.7                  | 4.7                        |
| PROC 135 - PROY 18                              | disulfide                 | no                  | 7                              | 100                            | 2                            | 9.7                   | 0                          |
| PROC 135 - PROY 19                              | disulfide                 | no                  | 7                              | 100                            | 2                            | 6.7                   | 0                          |
| PROC 135 - PROY 25                              | disulfide                 | no                  | 7                              | 100                            | 2                            | 14.2                  | 0                          |
| PROC 70 - PROY 18                               | disulfide                 |                     | 3                              | 7                              | 5                            | 10.4                  | 3.4                        |
| PROC 70 - PROY 19                               | disulfide                 |                     | 3                              | 7                              | 5                            | 8.7                   | 1.7                        |
| PROC 70 - PROY 20                               | disulfide                 |                     | 3                              | 7                              | 5                            | 11.5                  | 4.5                        |
| PROC 70 - PROY 21                               | disulfide                 |                     | 3                              | 7                              | 5                            | 9.1                   | 2.1                        |
| PROC 70 - PROY 22                               | disulfide                 |                     | 3                              | 7                              | 5                            | 4.7                   | 0                          |
| PROC 70 - PROY 23                               | disulfide                 |                     | 3                              | 7                              | 5                            | 8.3                   | 1.3                        |
| PROC 70 - PROY 24                               | disulfide                 |                     | 3                              | 7                              | 5                            | 7.7                   | 0.7                        |
| PROC 70 - PROY 25                               | disulfide                 |                     | 3                              | 7                              | 5                            | 5                     | 0                          |
| PROC 70 - PROY 27                               | disulfide                 |                     | 3                              | 7                              | 5                            | 7.6                   | 0.6                        |
| PROC 70 - PROY 29                               | disulfide                 | very weak           | 5                              | 20                             | 5                            | 12.1                  | 0                          |
| PROA 59 - PROX 69                               | DSS/BS3                   |                     | 5                              | 15                             | 20                           | 15.1                  | 0.1                        |
| PROC 59 - PROY 69                               | DSS/BS3                   |                     | 5                              | 15                             | 20                           | 14.7                  | 0                          |
| PROA 201 - PROX 69                              | DSS/BS3                   |                     | 3                              | 10                             | 20                           | 5.4                   | 0                          |

|                                 |          |   |    |    |      |     |
|---------------------------------|----------|---|----|----|------|-----|
| PROC 201 - PROY 69              | DSS/BS3  | 3 | 10 | 20 | 10.1 | 0.1 |
| PROA 201 - PROX 68              | AMAS     | 3 | 10 | 20 | 9.6  | 0   |
| PROC 201 - PROY 68              | AMAS     | 3 | 10 | 20 | 5.4  | 0   |
| PROA 217 - PROX 46              | DSS      | 5 | 15 | 20 | 14.1 | 0   |
| PROC 217 - PROY 46              | DSS      | 5 | 15 | 20 | 15.1 | 0.1 |
| PROA 217 - PROX 39              | DSS      | 5 | 15 | 20 | 8.1  | 0   |
| PROC 217 - PROY 39              | DSS      | 5 | 15 | 20 | 5    | 0   |
| PROA 246 - PROX 38 <sup>d</sup> | SMCC     | 4 | 12 | 20 | 10.6 | 0   |
| PROC 246 - PROY 38 <sup>d</sup> | SMCC     | 4 | 12 | 20 | 7.6  | 0   |
| PROA 246 - PROX 69              | SMCC     | 4 | 12 | 20 | 12.9 | 0.9 |
| PROC 246 - PROY 69              | SMCC     | 4 | 12 | 20 | 11.7 | 0   |
| PROA 246 - PROX 99              | SMCC     | 4 | 12 | 20 | 7.4  | 0   |
| PROC 246 - PROY 99              | SMCC     | 4 | 12 | 20 | 9.7  | 0   |
| PROA 246 - PROX 102             | SMCC     | 4 | 12 | 20 | 14.2 | 2.2 |
| PROC 246 - PROY 102             | SMCC     | 4 | 12 | 20 | 11.8 | 0   |
| PROA 246 - PROX 110             | BM(PEG)2 | 7 | 20 | 20 | 11.9 | 0   |
| PROC 246 - PROY 110             | BM(PEG)2 | 7 | 20 | 20 | 16.2 | 0   |

#### Cross-links within SpoIVFB

| Residues                         | Cross-linker | Observed cross-link | Minimum distance restraint (Å) | Maximum distance restraint (Å) | K (kcal/mol/Å <sup>2</sup> ) | Distance in model (Å) | Violation (Å) |
|----------------------------------|--------------|---------------------|--------------------------------|--------------------------------|------------------------------|-----------------------|---------------|
| PROA 154 - PROA 246              | SMCC         |                     | 4                              | 12                             | 20                           | 14.4                  | 2.4           |
| PROC 154 - PROC 246              | SMCC         |                     | 4                              | 12                             | 20                           | 13.5                  | 1.5           |
| PROB 201 - PROB 154              | AMAS         |                     | 3                              | 10                             | 20                           | 11.8                  | 1.8           |
| PROD 201 - PROD 154              | AMAS         |                     | 3                              | 10                             | 20                           | 10.5                  | 0.5           |
| PROA 217 - PROA 223              | DSS          |                     | 5                              | 15                             | 20                           | 6.3                   | 0             |
| PROC 217 - PROC 223              | DSS          |                     | 5                              | 15                             | 20                           | 6.8                   | 0             |
| PROA 217 - PROA 246              | SMCC         |                     | 4                              | 12                             | 20                           | 5.8                   | 0             |
| PROC 217 - PROC 246              | SMCC         |                     | 4                              | 12                             | 20                           | 9.1                   | 0             |
| PROA 217 - PROA 247              | BS3          |                     | 5                              | 15                             | 20                           | 12                    | 0             |
| PROC 217 - PROC 247              | BS3          |                     | 5                              | 15                             | 20                           | 15.3                  | 0.3           |
| PROA 223 - PROA 243              | DSS          |                     | 5                              | 15                             | 20                           | 15.1                  | 0.1           |
| PROB 223 - PROB 243              | DSS          |                     | 5                              | 15                             | 20                           | 16.8                  | 1.8           |
| PROC 223 - PROC 243              | DSS          |                     | 5                              | 15                             | 20                           | 15.5                  | 0.5           |
| PROD 223 - PROD 243              | DSS          |                     | 5                              | 15                             | 20                           | 19                    | 4             |
| PROA 223 - PROA 246              | SMCC         |                     | 4                              | 12                             | 20                           | 9.1                   | 0             |
| PROB 223 - PROB 246              | SMCC         |                     | 4                              | 12                             | 20                           | 12.2                  | 0.2           |
| PROC 223 - PROC 246              | SMCC         |                     | 4                              | 12                             | 20                           | 7.7                   | 0             |
| PROD 223 - PROD 246              | SMCC         |                     | 4                              | 12                             | 20                           | 12.6                  | 0.6           |
| PROA 223 - PROA 258              | DSS          |                     | 5                              | 15                             | 20                           | 15.4                  | 0.4           |
| PROB 223 - PROB 258              | DSS          |                     | 5                              | 15                             | 20                           | 11.4                  | 0             |
| PROC 223 - PROC 258              | DSS          |                     | 5                              | 15                             | 20                           | 15.4                  | 0.4           |
| PROD 223 - PROD 258              | DSS          |                     | 5                              | 15                             | 20                           | 8                     | 0             |
| PROA 230 - PROA 234              | BS3          |                     | 5                              | 15                             | 20                           | 11.9                  | 0             |
| PROB 230 - PROB 234              | BS3          |                     | 5                              | 15                             | 20                           | 6.9                   | 0             |
| PROC 230 - PROC 234              | BS3          |                     | 5                              | 15                             | 20                           | 12.5                  | 0             |
| PROD 230 - PROD 234              | BS3          |                     | 5                              | 15                             | 20                           | 6.1                   | 0             |
| PROA 230 - PROA 246              | SMCC         |                     | 4                              | 12                             | 20                           | 13.4                  | 1.4           |
| PROB 230 - PROB 246              | SMCC         |                     | 4                              | 12                             | 20                           | 9.9                   | 0             |
| PROC 230 - PROC 246              | SMCC         |                     | 4                              | 12                             | 20                           | 13                    | 1             |
| PROD 230 - PROD 246              | SMCC         |                     | 4                              | 12                             | 20                           | 12.1                  | 0.1           |
| PROA 234 - PROA 246              | SMCC         |                     | 4                              | 12                             | 20                           | 11.7                  | 0             |
| PROB 234 - PROB 246              | SMCC         |                     | 4                              | 12                             | 20                           | 12.2                  | 0.2           |
| PROC 234 - PROC 246              | SMCC         |                     | 4                              | 12                             | 20                           | 13.4                  | 1.4           |
| PROD 234 - PROD 246              | SMCC         |                     | 4                              | 12                             | 20                           | 13.5                  | 1.5           |
| PROA 246 - PROA 254 <sup>e</sup> | SMCC         |                     | 4                              | 12                             | 20                           | 7.8                   | 0             |
| PROB 246 - PROB 254 <sup>e</sup> | SMCC         |                     | 4                              | 12                             | 20                           | 13.2                  | 1.2           |

|                                  |      |   |    |    |      |     |
|----------------------------------|------|---|----|----|------|-----|
| PROC 246 - PROC 254 <sup>e</sup> | SMCC | 4 | 12 | 20 | 8.5  | 0   |
| PROD 246 - PROD 254 <sup>e</sup> | SMCC | 4 | 12 | 20 | 13   | 1   |
| PROA 246 - PROA 258              | SMCC | 4 | 12 | 20 | 13.8 | 1.8 |
| PROB 246 - PROB 258              | SMCC | 4 | 12 | 20 | 12.9 | 0.9 |
| PROC 246 - PROC 258              | SMCC | 4 | 12 | 20 | 14.2 | 2.2 |
| PROD 246 - PROD 258              | SMCC | 4 | 12 | 20 | 12.2 | 0.2 |
| PROA 246 - PROA 275              | SMCC | 4 | 12 | 20 | 12.8 | 0.8 |
| PROB 246 - PROB 275              | SMCC | 4 | 12 | 20 | 9.9  | 0   |
| PROC 246 - PROC 275              | SMCC | 4 | 12 | 20 | 12.9 | 0.9 |
| PROD 246 - PROD 275              | SMCC | 4 | 12 | 20 | 10.5 | 0   |
| PROA 254 - PROA 258              | BS3  | 5 | 15 | 20 | 6.8  | 0   |
| PROB 254 - PROB 258              | BS3  | 5 | 15 | 20 | 12.2 | 0   |
| PROC 254 - PROC 258              | BS3  | 5 | 15 | 20 | 6.8  | 0   |
| PROD 254 - PROD 258              | BS3  | 5 | 15 | 20 | 11.2 | 0   |

#### Cross-links within Pro- $\sigma^K$

| Residues                        | Cross-linker | Observed cross-link | Minimum distance restraint (Å) | Maximum distance restraint (Å) | K (kcal/mol/Å <sup>2</sup> ) | Distance in model (Å) | Violation (Å) |
|---------------------------------|--------------|---------------------|--------------------------------|--------------------------------|------------------------------|-----------------------|---------------|
| PROX 38 - PROX 46               | DSS/BS3      |                     | 5                              | 15                             | 20                           | 5.8                   | 0             |
| PROY 38 - PROY 46               | DSS/BS3      |                     | 5                              | 15                             | 20                           | 14                    | 0             |
| PROX 39 - PROX 46               | DSS/BS3      |                     | 5                              | 15                             | 20                           | 9.9                   | 0             |
| PROY 39 - PROY 46               | DSS/BS3      |                     | 5                              | 15                             | 20                           | 10.8                  | 0             |
| PROX 38 - PROX 69 <sup>f</sup>  | DTSSP        |                     | 5                              | 16                             | 20                           | 15.2                  | 0             |
| PROY 38 - PROY 69 <sup>f</sup>  | DTSSP        |                     | 5                              | 16                             | 20                           | 10.9                  | 0             |
| PROX 38 - PROX 99               | DSS          |                     | 5                              | 15                             | 20                           | 12.9                  | 0             |
| PROY 38 - PROY 99               | DSS          |                     | 5                              | 15                             | 20                           | 6.7                   | 0             |
| PROX 39 - PROX 99               | DSS          |                     | 5                              | 15                             | 20                           | 16.5                  | 1.5           |
| PROY 39 - PROY 99               | DSS          |                     | 5                              | 15                             | 20                           | 15.1                  | 0.1           |
| PROX 38 - PROX 110 <sup>f</sup> | SMCC         |                     | 4                              | 12                             | 20                           | 9.8                   | 0             |
| PROY 38 - PROY 110 <sup>f</sup> | SMCC         |                     | 4                              | 12                             | 20                           | 8.7                   | 0             |
| PROX 39 - PROX 102 <sup>g</sup> | DSS/BS3      |                     | 5                              | 15                             | 20                           | 11.5                  | 0             |
| PROY 39 - PROY 102 <sup>g</sup> | DSS/BS3      |                     | 5                              | 15                             | 20                           | 14                    | 0             |
| PROX 69 - PROX 102              | DSS/BS3      |                     | 5                              | 15                             | 20                           | 8.3                   | 0             |
| PROY 69 - PROY 102              | DSS/BS3      |                     | 5                              | 15                             | 20                           | 4.8                   | 0.2           |
| PROX 99 - PROX 110              | SMCC         |                     | 4                              | 12                             | 20                           | 8.1                   | 0             |
| PROY 99 - PROY 110              | SMCC         |                     | 4                              | 12                             | 20                           | 10.5                  | 0             |
| PROX 102 - PROX 110             | SMCC         |                     | 4                              | 12                             | 20                           | 12                    | 0             |
| PROY 102 - PROY 110             | SMCC         |                     | 4                              | 12                             | 20                           | 12.5                  | 0.5           |

<sup>a</sup>The chain and residue of protein (PRO) SpoIVFB is listed first, followed by the chain and residue of Pro- $\sigma^K$ .

<sup>b</sup>Abbreviations of chemical cross-linkers are listed in Table S1 footnote <sup>a</sup>.

<sup>c</sup>The distance between C $\alpha$  atoms of cross-linked residues in the model minus the theoretical maximum distance for the cross-linker, with negative values reported as 0.

<sup>d</sup>The cross-linking did not distinguish between residues 38 and 39 of Pro- $\sigma^K$  (Table S1), so both were used in the initial round of modeling, but residue 39 was omitted in the final round of modeling because it resulted in slightly higher violations.

<sup>e</sup>The cross-linking did not distinguish between residues 254 and 258 of SpoIVFB (Table S1), so both were used in the initial round of modeling, but residue 258 was omitted in the final round of modeling because it resulted in slightly higher violations.

<sup>f</sup>The cross-linking did not distinguish between residues 38 and 39 of Pro- $\sigma^K$  (Table S1), so both were used in the initial round of modeling, but residue 39 was omitted in the final round of modeling because it resulted in slightly higher violations.

<sup>g</sup>The cross-linking did not distinguish between residues 38 and 39 of Pro- $\sigma^K$  (Table S1), so both were used in the initial round of modeling, but residue 38 was omitted in the final round of modeling because it resulted in slightly higher violations.

**Table S4. Plasmids used in this study**

| <b>Plasmid</b> | <b>Description<sup>a, b</sup></b>                                             | <b>Construction</b>                                                                                                                                                                     | <b>Reference</b> |
|----------------|-------------------------------------------------------------------------------|-----------------------------------------------------------------------------------------------------------------------------------------------------------------------------------------|------------------|
| pDP40          | Sp <sup>R</sup> ; <i>amyE</i> :: <i>spoIVF</i> with SpoIVFB H206A             | pDR18a was subjected to site-directed mutagenesis using primers SH29 and SH30                                                                                                           | This study       |
| pDP41          | Sp <sup>R</sup> ; <i>amyE</i> :: <i>spoIVF</i> with SpoIVFB F209A             | pDR18a was subjected to site-directed mutagenesis using primers SH35 and SH36                                                                                                           | This study       |
| pDP42          | Sp <sup>R</sup> ; <i>amyE</i> :: <i>spoIVF</i> with SpoIVFB R213A             | pDR18a was subjected to site-directed mutagenesis using primers SH37 and SH38                                                                                                           | This study       |
| pDP43          | Sp <sup>R</sup> ; <i>amyE</i> :: <i>spoIVF</i> with SpoIVFB H206A F209A R213A | pDR18a was subjected to site-directed mutagenesis using primers SH61 and SH62                                                                                                           | This study       |
| pDP61          | Sp <sup>R</sup> ; <i>amyE</i> :: <i>spoIVF</i> with SpoIVFB H206F             | pDR18a was subjected to site-directed mutagenesis using primers DP127 and DP128                                                                                                         | This study       |
| pDP62          | Sp <sup>R</sup> ; <i>amyE</i> :: <i>spoIVF</i> with SpoIVFB R208Q             | pDR18a was subjected to site-directed mutagenesis using primers DP135 and DP136                                                                                                         | This study       |
| pDP63          | Sp <sup>R</sup> ; <i>amyE</i> :: <i>spoIVF</i> with SpoIVFB F209D             | pDR18a was subjected to site-directed mutagenesis using primers DP129 and DP130                                                                                                         | This study       |
| pDP64          | Sp <sup>R</sup> ; <i>amyE</i> :: <i>spoIVF</i> with SpoIVFB L210I             | pDR18a was subjected to site-directed mutagenesis using primers DP137 and DP138                                                                                                         | This study       |
| pDP65          | Sp <sup>R</sup> ; <i>amyE</i> :: <i>spoIVF</i> with SpoIVFB R213K             | pDR18a was subjected to site-directed mutagenesis using primers DP131 and DP132                                                                                                         | This study       |
| pDP74          | Ap <sup>R</sup> ; TM-SpoIVFB-F2-H2 R208A                                      | pZR209 was subjected to site-directed mutagenesis using primers SH33 and SH34                                                                                                           | This study       |
| pDP75          | Ap <sup>R</sup> ; TM-SpoIVFB-F2-H2 F209A                                      | pZR209 was subjected to site-directed mutagenesis using primers SH35 and SH36                                                                                                           | This study       |
| pDR18a         | Sp <sup>R</sup> ; <i>amyE</i> :: <i>spoIVF</i>                                | The intact <i>spoIVF</i> operon was cloned into pLD30                                                                                                                                   | (13)             |
| pSH01          | Ap <sup>R</sup> ; TM-SpoIVFB(1-197)-F2                                        | SpoIVFB(1-197) was amplified by PCR using pZR209 as template and primers LK1385 and SH92, the fragment was digested with BamHI and HindIII, and ligated to BamHI-HindIII-digested pYZ68 | This study       |
| pSH02          | Ap <sup>R</sup> ; TM-SpoIVFB(1-222)-F2                                        | SpoIVFB(1-222) was amplified by PCR using pZR209 as template and primers LK1385 and SH91, the fragment was digested with BamHI and HindIII, and ligated to BamHI-HindIII-digested pYZ68 | This study       |
| pSH03          | Ap <sup>R</sup> ; TM-SpoIVFB(212-288)-F2                                      | SpoIVFB(212-288) was amplified by PCR using pZR209 as template and primers SH89 and SH84, the fragment was digested with BamHI and HindIII, and ligated to BamHI-HindIII-digested pYZ68 | This study       |
| pSH04          | Ap <sup>R</sup> ; TM-SpoIVFB(222-288)-F2                                      | SpoIVFB(222-288) was amplified by PCR using pZR209 as template and primers SH88 and SH84, the fragment was digested with BamHI and HindIII, and ligated to BamHI-HindIII-digested pYZ68 | This study       |
| pSH05          | Ap <sup>R</sup> ; TM-SpoIVFB(197-288)-F2                                      | SpoIVFB(197-288) was amplified by PCR using pZR209 as template and primers SH83 and SH84, the fragment was digested with BamHI and HindIII, and ligated to BamHI-HindIII-digested pYZ68 | This study       |
| pSH06          | Ap <sup>R</sup> ; TM-SpoIVFB(197-222)-F2                                      | SpoIVFB(197-222) was amplified by PCR using pZR209 as template and primers SH83 and SH91, the fragment was digested with                                                                | This study       |

|       |                                                                             |                                                                                                                                                                                         |            |
|-------|-----------------------------------------------------------------------------|-----------------------------------------------------------------------------------------------------------------------------------------------------------------------------------------|------------|
|       |                                                                             | BamHI and HindIII, and ligated to BamHI-HindIII-digested pYZ68                                                                                                                          |            |
| pSH07 | Ap <sup>R</sup> ; TM-SpoIVFB(1-212)-F2                                      | SpoIVFB(1-212) was amplified by PCR using pZR209 as template and primers LK1385 and SH90, the fragment was digested with BamHI and HindIII, and ligated to BamHI-HindIII-digested pYZ68 | This study |
| pSH08 | Ap <sup>R</sup> ; TM-SpoIVFB(EYR198-200AAA)-F2-H2                           | pZR209 was subjected to site-directed mutagenesis using primers SH01 and SH02                                                                                                           | This study |
| pSH09 | Ap <sup>R</sup> ; TM-SpoIVFB(QRH201-203AAA)-F2-H2                           | pZR209 was subjected to site-directed mutagenesis using primers SH03 and SH04                                                                                                           | This study |
| pSH10 | Ap <sup>R</sup> ; TM-SpoIVFB(YIH204-206AAA)-F2-H2                           | pZR209 was subjected to site-directed mutagenesis using primers SH05 and SH06                                                                                                           | This study |
| pSH11 | Ap <sup>R</sup> ; TM-SpoIVFB(VRF207-209AAA)-F2-H2                           | pZR209 was subjected to site-directed mutagenesis using primers SH07 and SH08                                                                                                           | This study |
| pSH12 | Ap <sup>R</sup> ; TM-SpoIVFB(LLE210-212AAA)-F2-H2                           | pZR209 was subjected to site-directed mutagenesis using primers SH09 and SH10                                                                                                           | This study |
| pSH13 | Ap <sup>R</sup> ; TM-SpoIVFB(RYY213-215AAA)-F2-H2                           | pZR209 was subjected to site-directed mutagenesis using primers SH11 and SH12                                                                                                           | This study |
| pSH14 | Ap <sup>R</sup> ; TM-SpoIVFB(GKN216-218AAA)-F2-H2                           | pZR209 was subjected to site-directed mutagenesis using primers SH13 and SH14                                                                                                           | This study |
| pSH15 | Ap <sup>R</sup> ; TM-SpoIVFB(REL219-221AAA)-F2-H2                           | pZR209 was subjected to site-directed mutagenesis using primers SH15 and SH16                                                                                                           | This study |
| pSH16 | Ap <sup>R</sup> ; TM-SpoIVFB(EKL222-224AAA)-F2-H2                           | pZR209 was subjected to site-directed mutagenesis using primers SH17 and SH18                                                                                                           | This study |
| pSH26 | Ap <sup>R</sup> ; TM-SpoIVFB-F2-H2 with residues 201-212 changed to alanine | pZR209 was subjected to site-directed mutagenesis using primers SH55 and SH56                                                                                                           | This study |
| pSH27 | Ap <sup>R</sup> ; TM-SpoIVFB-F2 with residues 201-212 changed to alanine    | pYZ68 was subjected to site-directed mutagenesis using primers SH55 and SH56                                                                                                            | This study |
| pSH28 | Ap <sup>R</sup> ; TM-SpoIVFB-F2-H2 E198A                                    | pZR209 was subjected to site-directed mutagenesis using primers SH19 and SH20                                                                                                           | This study |
| pSH30 | Ap <sup>R</sup> ; TM-SpoIVFB-F2-H2 Y199A                                    | pZR209 was subjected to site-directed mutagenesis using primers SH21 and SH22                                                                                                           | This study |
| pSH31 | Ap <sup>R</sup> ; TM-SpoIVFB-F2-H2 R200A                                    | pZR209 was subjected to site-directed mutagenesis using primers SH23 and SH24                                                                                                           | This study |
| pSH36 | Ap <sup>R</sup> ; TM-SpoIVFB-F2-H2 Y204A                                    | pZR209 was subjected to site-directed mutagenesis using primers SH25 and SH26                                                                                                           | This study |
| pSH38 | Ap <sup>R</sup> ; TM-SpoIVFB-F2-H2 I205A                                    | pZR209 was subjected to site-directed mutagenesis using primers SH27 and SH28                                                                                                           | This study |
| pSH39 | Ap <sup>R</sup> ; TM-SpoIVFB-F2-H2 H206A                                    | pZR209 was subjected to site-directed mutagenesis using primers SH29 and SH30                                                                                                           | This study |
| pSH41 | Ap <sup>R</sup> ; TM-SpoIVFB-F2-H2 V207A                                    | pZR209 was subjected to site-directed mutagenesis using primers SH31 and SH32                                                                                                           | This study |
| pSH43 | Ap <sup>R</sup> ; TM-SpoIVFB-F2-H2 R213A                                    | pZR209 was subjected to site-directed mutagenesis using primers SH37 and SH38                                                                                                           | This study |
| pSH45 | Ap <sup>R</sup> ; TM-SpoIVFB-F2-H2 Y214A                                    | pZR209 was subjected to site-directed mutagenesis using primers SH39 and SH40                                                                                                           | This study |
| pSH48 | Ap <sup>R</sup> ; TM-SpoIVFB-F2-H2 Y215A                                    | pZR209 was subjected to site-directed mutagenesis using primers SH41 and SH42                                                                                                           | This study |
| pSH49 | Ap <sup>R</sup> ; TM-SpoIVFB-F2-H2 G216A                                    | pZR209 was subjected to site-directed mutagenesis using primers SH43 and SH44                                                                                                           | This study |
| pSH52 | Ap <sup>R</sup> ; TM-SpoIVFB-F2-H2 K217A                                    | pZR209 was subjected to site-directed mutagenesis using primers SH45 and SH46                                                                                                           | This study |

|        |                                                                           |                                                                               |            |
|--------|---------------------------------------------------------------------------|-------------------------------------------------------------------------------|------------|
| pSH54  | Ap <sup>R</sup> ; TM-SpoIVFB-F2-H2 N218A                                  | pZR209 was subjected to site-directed mutagenesis using primers SH47 and SH48 | This study |
| pSH55  | Ap <sup>R</sup> ; TM-SpoIVFB-F2 E44Q H206A                                | pYZ68 was subjected to site-directed mutagenesis using primers SH29 and SH30  | This study |
| pSH56  | Ap <sup>R</sup> ; TM-SpoIVFB-F2 E44Q F209A                                | pYZ68 was subjected to site-directed mutagenesis using primers SH35 and SH36  | This study |
| pSH57  | Ap <sup>R</sup> ; TM-SpoIVFB-F2 E44Q R213A                                | pYZ68 was subjected to site-directed mutagenesis using primers SH37 and SH38  | This study |
| pSH58  | Ap <sup>R</sup> ; TM-SpoIVFB-F2 E44Q H206A F209A R213A                    | pYZ68 was subjected to site-directed mutagenesis using primers SH61 and SH62  | This study |
| pSH59  | Km <sup>R</sup> ; Pro-σ <sup>K</sup> (1-127)-H6/SpoIVFB-TEV-F2 E44Q Q201C | pYZ42 was subjected to site-directed mutagenesis using primers SH65 and SH66  | This study |
| pYZ42  | Km <sup>R</sup> ; Pro-σ <sup>K</sup> (1-126)-H6/SpoIVFB-TEV-F2 E44Q       |                                                                               | (2)        |
| pYZ68  | Ap <sup>R</sup> ; TM-SpoIVFB-F2 E44Q                                      |                                                                               | (2)        |
| pZR12  | Km <sup>R</sup> ; Pro-σ <sup>K</sup> (1-127)-H6                           |                                                                               | (15)       |
| pZR209 | Ap <sup>R</sup> ; TM-SpoIVFB-F2-H6                                        |                                                                               | (1)        |

<sup>a</sup>Abbreviations: Sp<sup>R</sup>, spectinomycin-resistant; Ap<sup>R</sup>, ampicillin-resistant; TM, transmembrane segment from rabbit Cytochrome P450 2B4; F2, two FLAG epitopes; H6, 6 His residues; Km<sup>R</sup>, kanamycin-resistant; TEV, Tobacco Etch Virus protease cleavage site.

<sup>b</sup>Each protein listed is preceded by a T7 RNA polymerase promoter and a translation initiation sequence to permit expression in *E. coli*.

**Table S5. Primers used in this study**

| <b>Primer</b> | <b>Sequence</b>                                   |
|---------------|---------------------------------------------------|
| DP127         | CGGCAAAGGCACTATATCTTTGTGAGATTTCTCCTCGAA           |
| DP128         | TTCGAGGAGAAATCTCACAAAGATATAGTGCCTTTGCCG           |
| DP129         | CACTATATCCATGTGAGAGATCTCCTCGAAAGGTATTAC           |
| DP130         | GTAATACCTTTTCGAGGAGATCTCTCACATGGATATAGTG          |
| DP131         | GTGAGATTTCTCCTCGAAAAGTATTACGGAAAAAACAGG           |
| DP132         | CCTGTTTTTCCGTAATACTTTTCGAGGAGAAATCTCAC            |
| DP135         | AGGCACTATATCCATGTGCAATTTCTCCTCGAAAGGTAT           |
| DP136         | ATACCTTTTCGAGGAGAAATTGCACATGGATATAGTGCCT          |
| DP137         | TATATCCATGTGAGATTTATCCTCGAAAGGTATTACGGA           |
| DP138         | TCCGTAATACCTTTTCGAGGATAAATCTCACATGGATATA          |
| LK1385        | CGGGATCCATGAATAAATGGCTCGACCTTATC                  |
| SH01          | GTTTCCTTGTTTGAGGCAGCGGCACAAAGGCACTATATC           |
| SH02          | GATATAGTGCTCTTGCGCGCTGCCTCAAACAAGGAAAC            |
| SH03          | GTTTGAGGAATATCGGGCAGCGGCATATATCATGTGAG            |
| SH04          | CTCACATGGATATATGCGCGCTGCCCGATATTCTCAAAC           |
| SH05          | GAATATCGGCAAAGGCACGCAGCGGCAGTGAGATTTCTCCTC        |
| SH06          | GAGGAGAAATCTCACTGCCGCTGCGTGCCTTTGCCGATATTC        |
| SH07          | GGCACTATATCCATGCAGCGCACTCCTCGAAAGGKTATTAC         |
| SH08          | GTAATACCTTTTCGAGGAGTGCCGCTGCATGGATATAGTGCC        |
| SH09          | CTATATCCATGTGAGATTTGCAGCGGCAAGGTATTACGGAAAAAAC    |
| SH10          | GTTTTTCCGTAATACCTTGCCGCTGCAAATCTCACATGGATATAG     |
| SH11          | GAGATTTCTCCTCGAAGCAGCGGCAGGAAAAAACAGGGAG          |
| SH12          | CTCCCTGTTTTTCTGCGCGCTGCTTCGAGGAGAAATCTC           |
| SH13          | CTCGAAAGGTATTACGCAGCGGCAAGGGAGCTTGAGCTTGAGAAACTTC |
| SH14          | GAAGTTTCTCAAGCTCCCTTGCCGCTGCGTAATACCTTTTCG AG     |
| SH15          | GTATTACGGAAAAACAGGGCAGCGGCAAAACTTCTGCTGCCGCTGAC   |
| SH16          | GTCAGCGGCAGAAAGTTTTGCGCGCTGCCCTGTTTTTCCGTAATAC    |
| SH17          | GAAAAACAGGGAGCTTGAGGCAGCGGCACCGCCGCTGACAGTAAAG    |
| SH18          | CTTTACTGTGAGCGTGCCGCTGCCTCAAGCTCCCTGTTTTTTC       |
| SH19          | GTTTCCTTGTTTGAGGCATATCGGCAAAGGCAC                 |
| SH20          | GTGCCCTTGCCGATATGCCTCAAACAAGGAAAC                 |
| SH21          | GTTTCCTTGTTTGAGGAAGCACGGCAAAGGCACTATATC           |
| SH22          | GATATAGTGCTTTTGCCGCTTCTCAAACAAGGAAAC              |
| SH23          | GTTTCCTTGTTTGAGGAATATGCGCAAAGGCACTATATCCATG       |
| SH24          | CATGGATATAGTGCCTTTGCGCATATTCTCAAACAAGGAAAC        |
| SH25          | GAATATCGGCAAAGGCACGCAATCCATGTGAGATTTCTC           |
| SH26          | GAGAAATCTCACATGGATTGCGTGCCTTTGCCGATATTC           |
| SH27          | CGGCAAAGGCACTATGCGCATGTGAGATTTCTCCTC              |
| SH28          | GAGGAGAAATCTCACATGCGCATAGTGCCTTTGCCG              |
| SH29          | GGCAAAGGCACTATATCGCGGTGAGATTTCTCCTCG              |
| SH30          | CGAGGAGAAATCTCACCGCATATAGTGCCTTTGCC               |
| SH31          | GGCACTATATCCATGCGAGATTTCTCCTCG                    |
| SH32          | CGAGGAGAAATCTCGCATGGATATAGTGCC                    |
| SH33          | GGCACTATATCCATGTGGCATTCTCCTCGAAAGG                |
| SH34          | CCTTTTCGAGGAGAAATGCCACATGGATATAGTGCC              |
| SH35          | CACTATATCCATGTGAGAGCACTCCTCGAAAGGTATTACG          |
| SH36          | CGTAATACCTTTTCGAGGAGTGCTCTCACATGGATATAGTG         |
| SH37          | GTGAGATTTCTCCTCGAAGCGTATTACGGAAAAAACAG            |
| SH38          | CTGTTTTTCCGTAATACGCTTCGAGGAGAAATCTCAC             |
| SH39          | GATTTCTCCTCGAAAGGGCATACGGAAAAAACAGGGAG            |



|      |                                                                                   |
|------|-----------------------------------------------------------------------------------|
| SH40 | CTCCCTGTTTTTCCGTATGCCCTTTCGAGGAGAAATC                                             |
| SH41 | GATTTCTCCTCGAAAGGTATGCGGGAAAAAACAGGGAGCTTG                                        |
| SH42 | CAAGCTCCCTGTTTTTCCCGCATACTTTCGAGGAGAAATC                                          |
| SH43 | CTCGAAAGGTATTACGCAAAAAACAGGGAGCTTG                                                |
| SH44 | CAAGCTCCCTGTTTTTGCCTAATACCTTTCGAG                                                 |
| SH45 | CGAAAGGTATTACGGAGCAAACAGGGAGCTTGAG                                                |
| SH46 | CTCAAGCTCCCTGTTTGCTCCGTAATACCTTTCG                                                |
| SH47 | GAAAGGTATTACGGAAAAGCGAGGGAGCTTGAGAACTTC                                           |
| SH48 | GAAGTTTCTCAAGCTCCCTCGCTTTTCCGTAATACCTTTC                                          |
| SH55 | GTTTCCTTGTTTGAGGAATATCGGGCAGCGGCAGCGGCAGCGGCAGCGGCAGCGGCA<br>GCGAGGTATTACGGAAAAAC |
| SH56 | GTTTTTCCGTAATACCTCGCTGCCGCTGCCGCTGCCGCTGCCGCTGCCGCTGC<br>CCGATATTCCTCAAACAAGGAAAC |
| SH61 | GGCAAAGGCACTATATCGCGGTGAGAGCACTCCTCGAAGCGTATTACGGAAAAACAG                         |
| SH62 | CTGTTTTTCCGTAATACGCTTCGAGGAGTGCTCTCACCGCGATATAGTGCCTTTGCC                         |
| SH65 | GTTTCCTTGTTTGAGGAATATCGGTGTAGGCACTATATCCATGTGAG                                   |
| SH66 | CTCACATGGATATAGTGCCTACACCGATATTCCTCAAACAAGGAAAC                                   |
| SH83 | CGGGATCCGAATATCGGCAAAGGCAC                                                        |
| SH84 | GCCAAGCTTGTAGGGCAGAAGCAGTTCC                                                      |
| SH88 | CGGGATCCTTCGAGGAGAAATCTCACAT                                                      |
| SH89 | CGGGATCCGAAAGGTATTACGGAAAAACAGG                                                   |
| SH90 | GCCAAGCTTTTCGAGGAGAAATCTCACAT                                                     |
| SH91 | GCCAAGCTTCTCAAGCTCCCTGTTTTTTC                                                     |
| SH92 | GCCAAGCTTCTCAAACAAGGAAACAGCCAG                                                    |

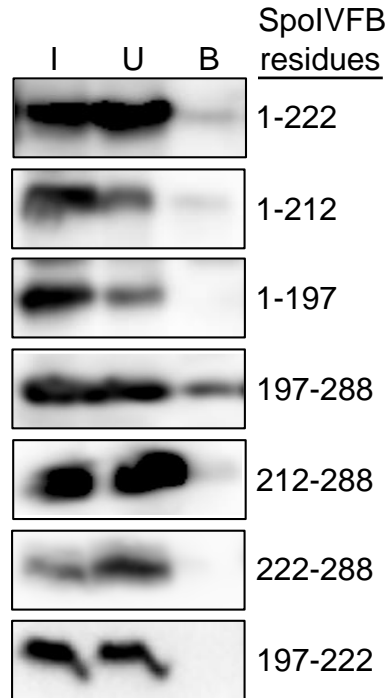

**Figure S1.** Control pull-down assays of SpoIVFB derivatives in the absence of Pro- $\sigma^K$ . The indicated deletion derivative was expressed without Pro- $\sigma^K$  in *E. coli* for 2 h and samples were subjected to pull-down assays. Input (I), unbound (U), and bound (B) fractions were subjected to immunoblot analysis with anti-FLAG antibodies. More of the 197-288 derivative was bound in the absence of Pro- $\sigma^K$  than for the other derivatives. Nevertheless, more of the 197-288 was bound in the presence of Pro- $\sigma^K$  (Fig. 1C) than in its absence.

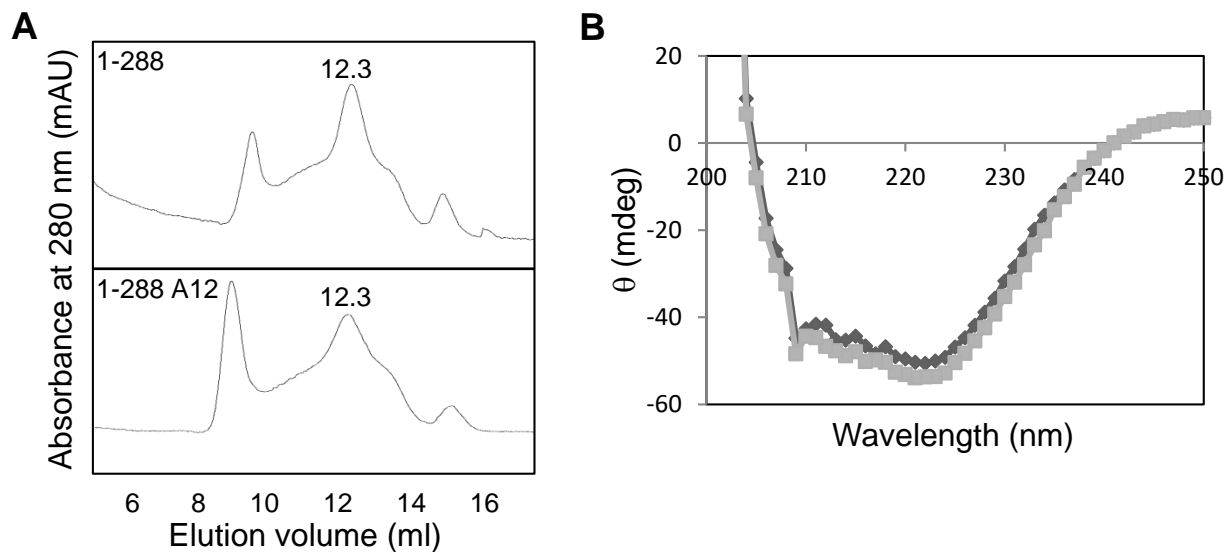

**Figure S2.** Purification of SpoIVFB. (A) Size exclusion chromatography during purification of SpoIVFB 1-288 (top) and 1-288 A12 (bottom). Proteins expressed in *E. coli* were subjected to cobalt-affinity purification, the bound fraction was concentrated and applied to a size exclusion column, and the absorbance at 280 nm was monitored during elution to generate the profiles shown. The absorbance peak at 12.3 ml contains primarily SpoIVFB as judged by SDS-PAGE followed by Coomassie Blue staining. (B) Circular dichroism (CD) spectra of purified 1-288 (dark gray diamonds) and 1-288 A12 (light gray squares). CD at the indicated wavelengths was measured for protein samples that eluted from the size exclusion column in the fraction containing the absorbance peak at 12.3 ml in panel A.

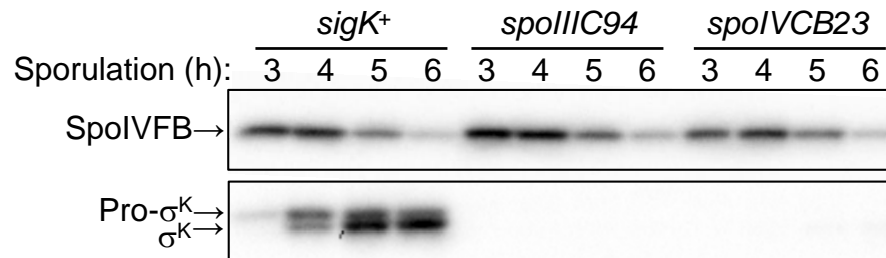

**Figure S3.** Effects of *sigK* mutations on SpolVFB during *B. subtilis* sporulation. *B. subtilis* strain PY79 with a wild-type *sigK* gene or a mutation in the 3' (*spolIIC94*) or 5' (*spolVCB23*) half of *sigK* [strains BK410 (16) and BK556 (17), respectively], were induced to sporulate, and samples collected at the indicated times post-induction were subjected to immunoblot analysis with antibodies against SpolVFB (top) or Pro- $\sigma^K$  (bottom).

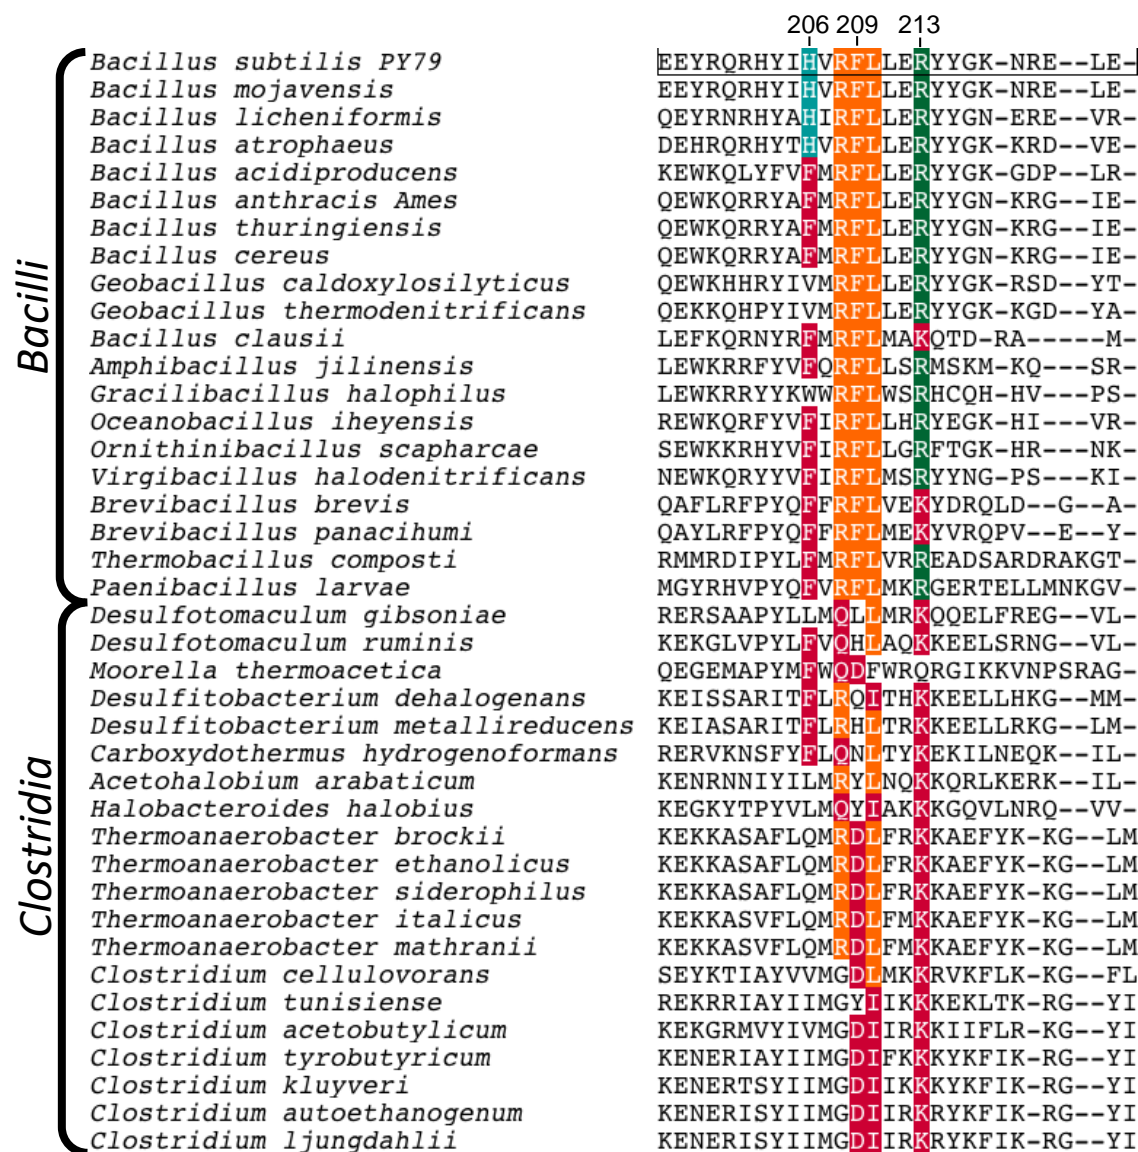

**Figure S4.** Alignment of SpoIVFB interdomain linker sequences. Representative sequences of *Bacilli* and *Clostridia* are shown from among 136 SpoIVFB orthologs. The *B. subtilis* sequence is boxed at the top with key residues numbered. Colors indicate conservation among sequences of 76 *Bacilli* (orange  $\geq 90\%$ , green  $\geq 80\%$ , teal  $\leq 50\%$ ) or alternate conserved residues that guided substitutions made in *B. subtilis* SpoIVFB (red).

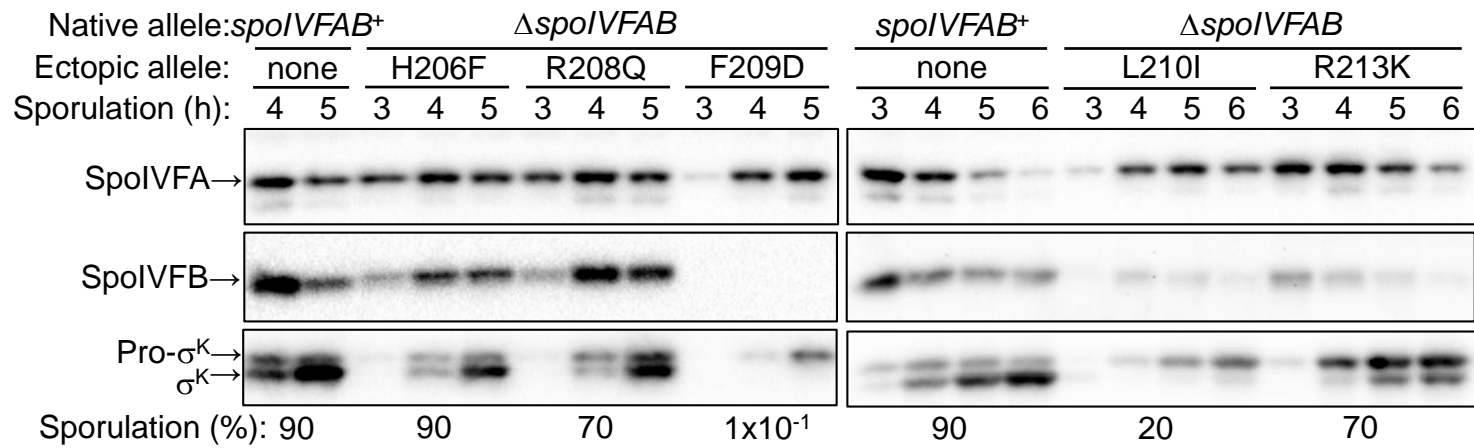

**Figure S5.** Effect of substitutions in the SpoIVFB interdomain linker during *B. subtilis* sporulation. The experiment was performed as described in the Figure 3 legend.

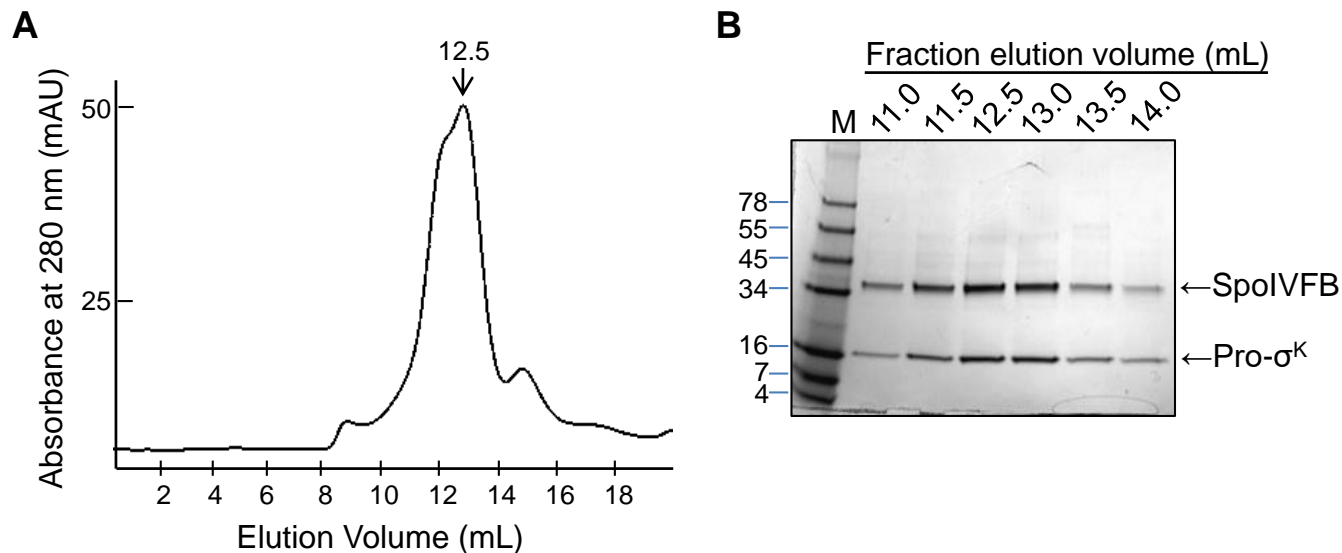

**Figure S6.** Purification of a SpoIVFB-Pro- $\sigma^K$  complex. (A) Size exclusion chromatography UV absorbance profile. Pro- $\sigma^K$ (1-127)-His<sub>6</sub> and SpoIVFB-TEV-FLAG<sub>2</sub> E44Q were coexpressed in *E. coli*, subjected to cobalt-affinity purification, the bound fraction was concentrated and applied to a size exclusion column, and the absorbance at 280 nm was monitored during elution, resulting in a broad peak with a maximum at 12.5 mL. (B) SDS/PAGE of fractions from the size exclusion column. Fractions eluting at the indicated volumes were subjected to SDS/PAGE followed by Coomassie Blue staining. Peak fractions contained predominantly SpoIVFB and Pro- $\sigma^K$  as judged by migration versus protein markers (M, molecular weight in kDa at left) and immunoblot (e.g., Fig. 4B, lanes NC).

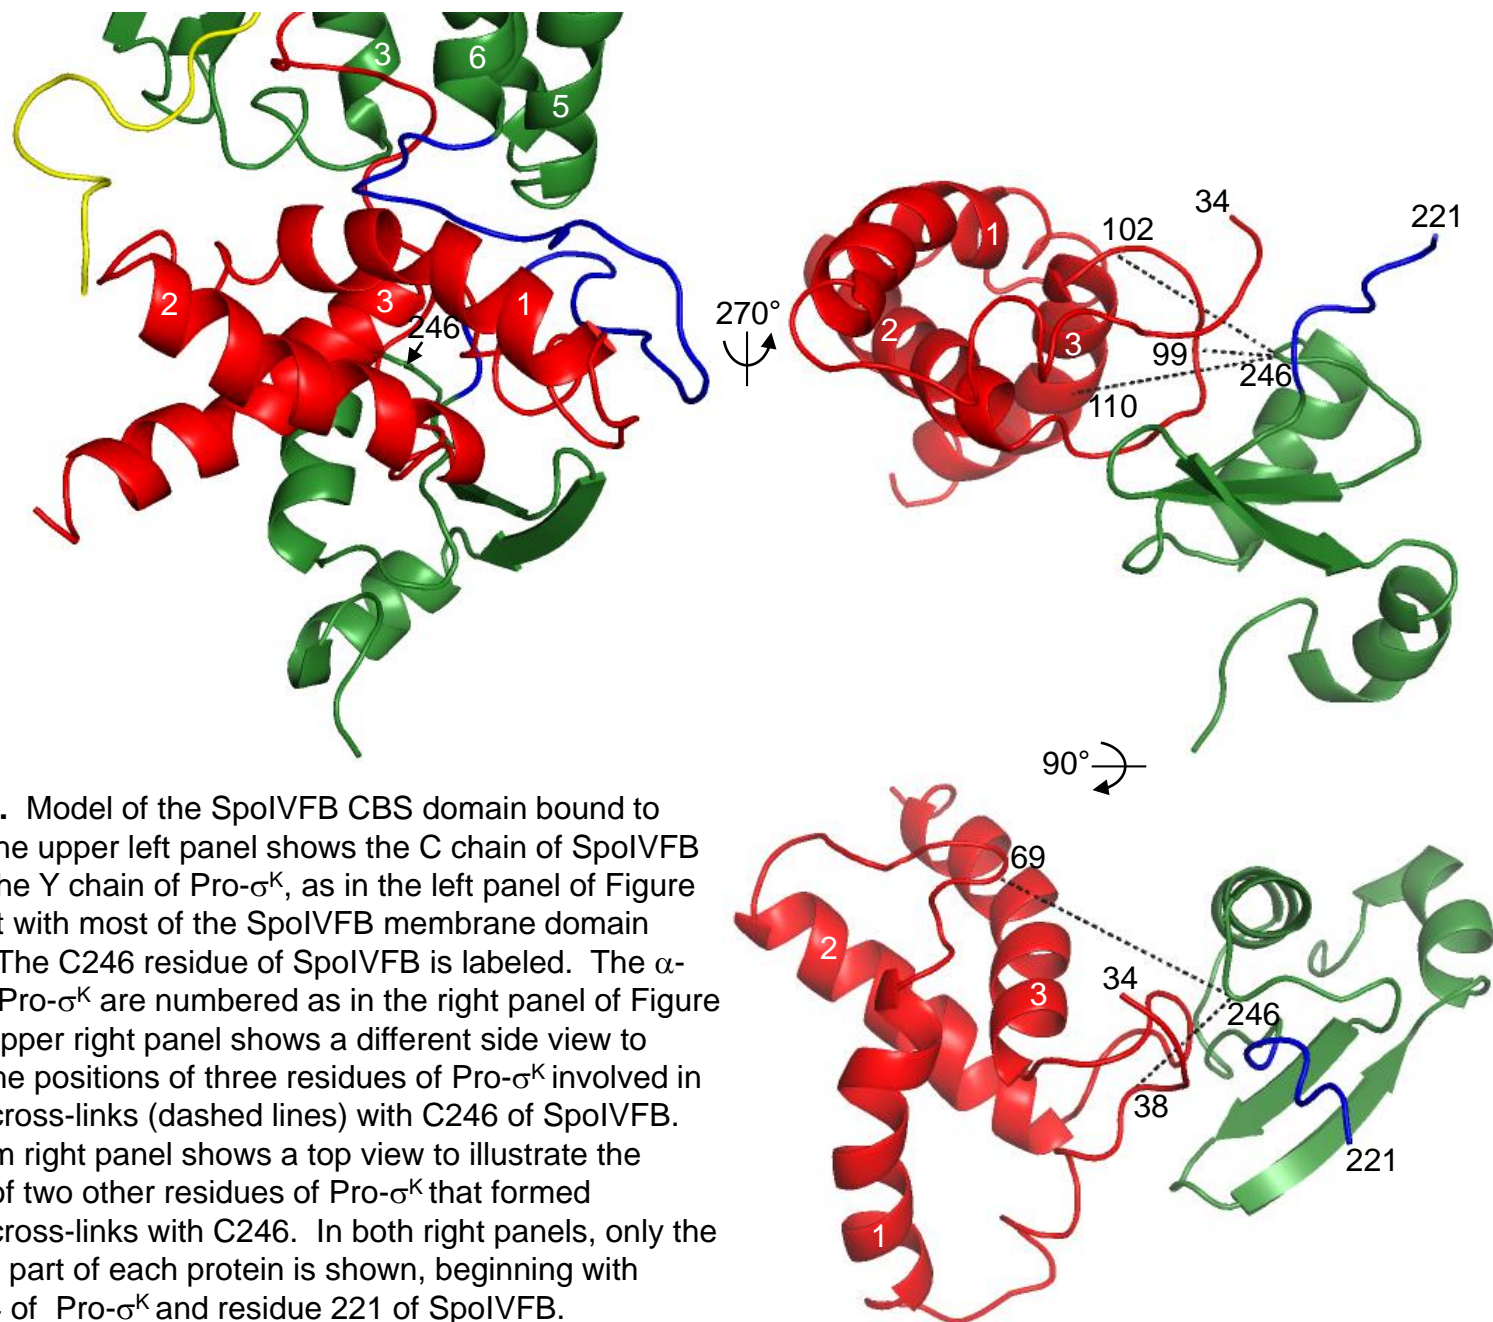



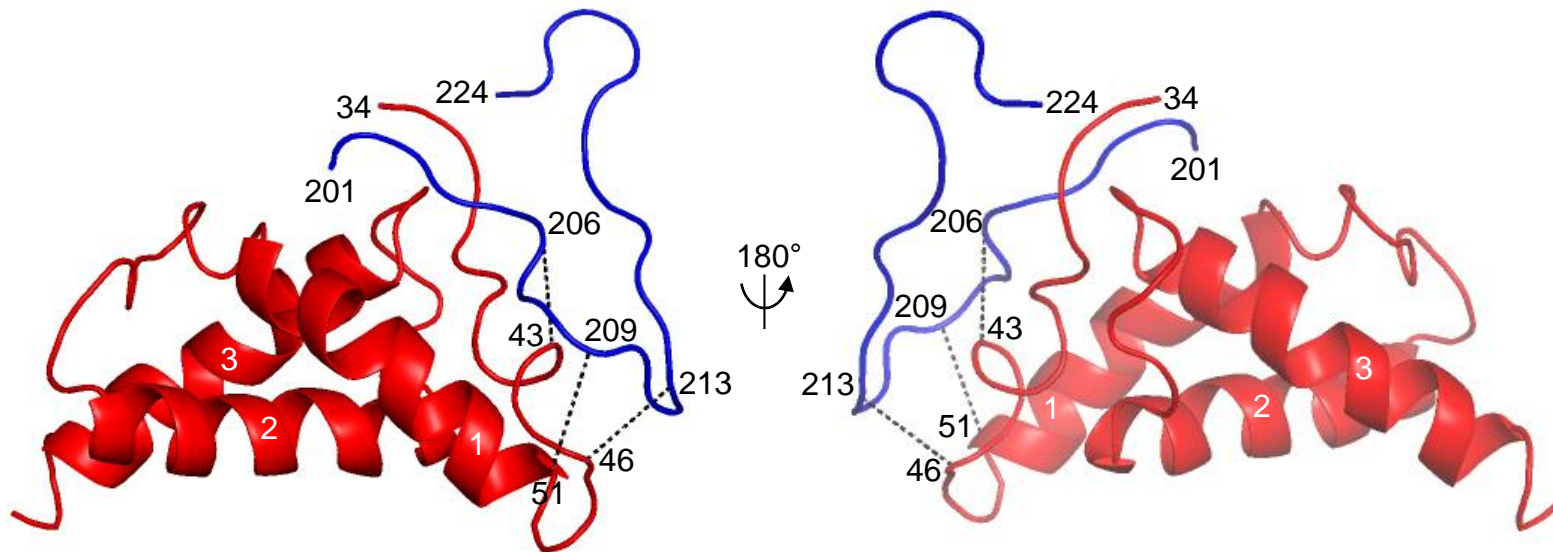

**Figure S8.** Model of the interaction between the SpoIVFB interdomain linker and residues 43-51 of Pro- $\sigma^K$ . The left panel shows the Y chain of Pro- $\sigma^K$  residues 34-122 in a similar orientation as in the right panel of Figure 5B, except rotated forward slightly. Only residues 201-224 of the C chain of the SpoIVFB linker are shown. Dashed lines indicate points of closest proximity (7 Å in each case) between the chains (distance between C $\alpha$  atoms of indicated residues). The right panel shows the back view.

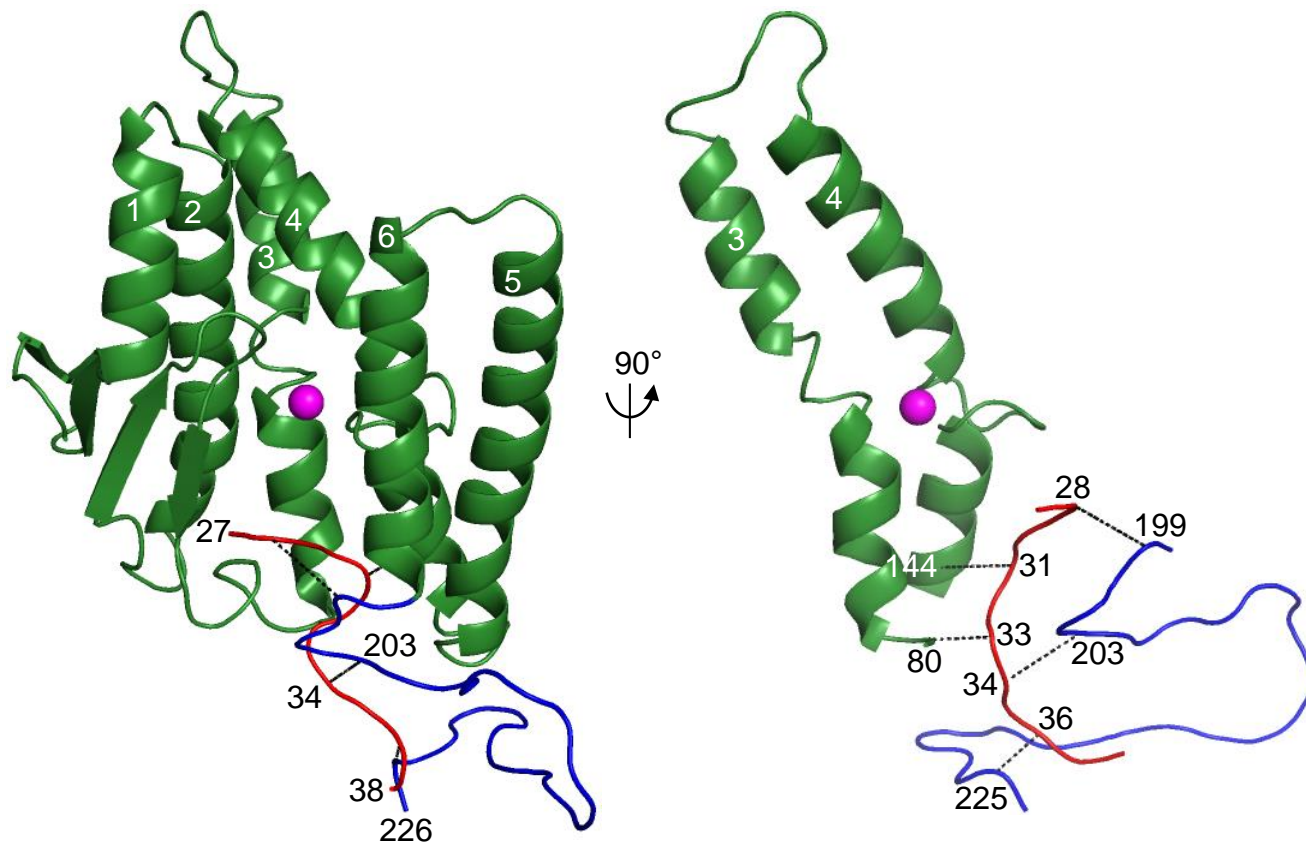

**Figure S9.** Model of the interaction between SpoIVFB and residues 28-36 of Pro- $\sigma^K$ . The left panel shows the C chain of SpoIVFB residues 1-226 in a similar orientation as in the left panel of Figure 5B. Only residues 27-38 of the Y chain of Pro- $\sigma^K$  are shown. Dashed lines indicate points of closest proximity (5-7 Å in each case) between the chains (distance between C $\alpha$  atoms of indicated residues). The right panel shows a different side view, with residues 1-78 and 147-197 of SpoIVFB removed to better show the points of closest proximity.

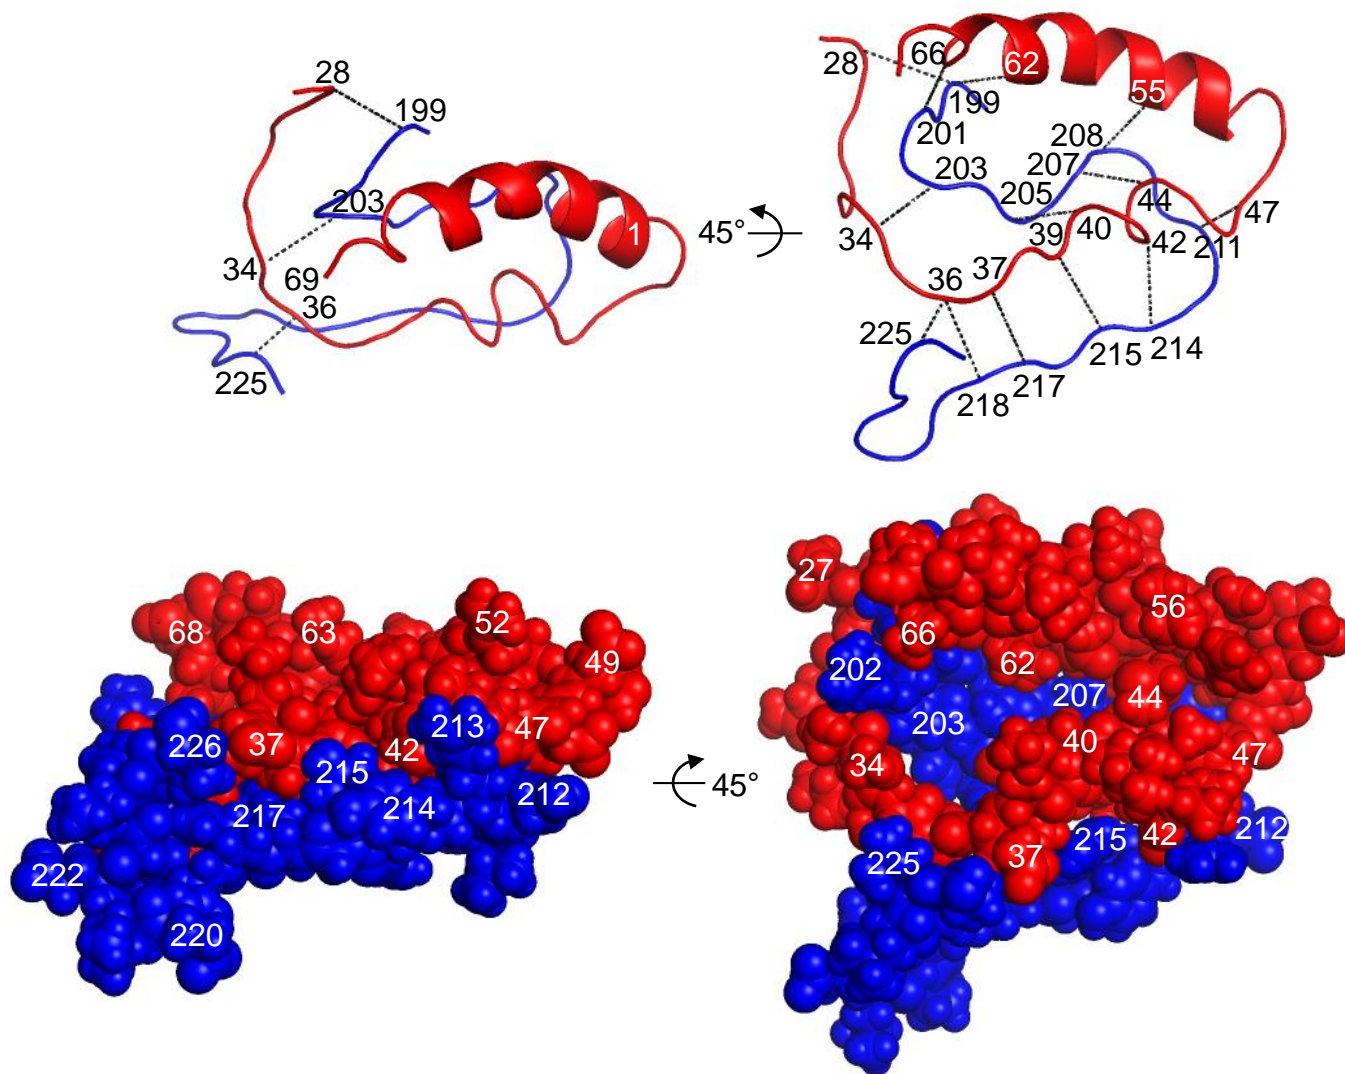

**Figure S10.** Model of the interaction between the SpoIVFB interdomain linker and residues 28-69 of Pro- $\sigma^K$ . The upper left panel shows the C chain of SpoIVFB residues 198-226 as in the right panel of Figure S9. Residues 27-69 of the Y chain of Pro- $\sigma^K$  are shown, with  $\alpha$ -helix 1 labeled. Dashed lines indicate points of proximity (5-7 Å in each case) between the chains (distance between C $\alpha$  atoms of indicated residues). The upper right panel shows additional points of proximity (6-8 Å in each case). The lower right panel shows the same view with side chains added and space-filling atoms to illustrate packing. The lower left panel further illustrates packing.

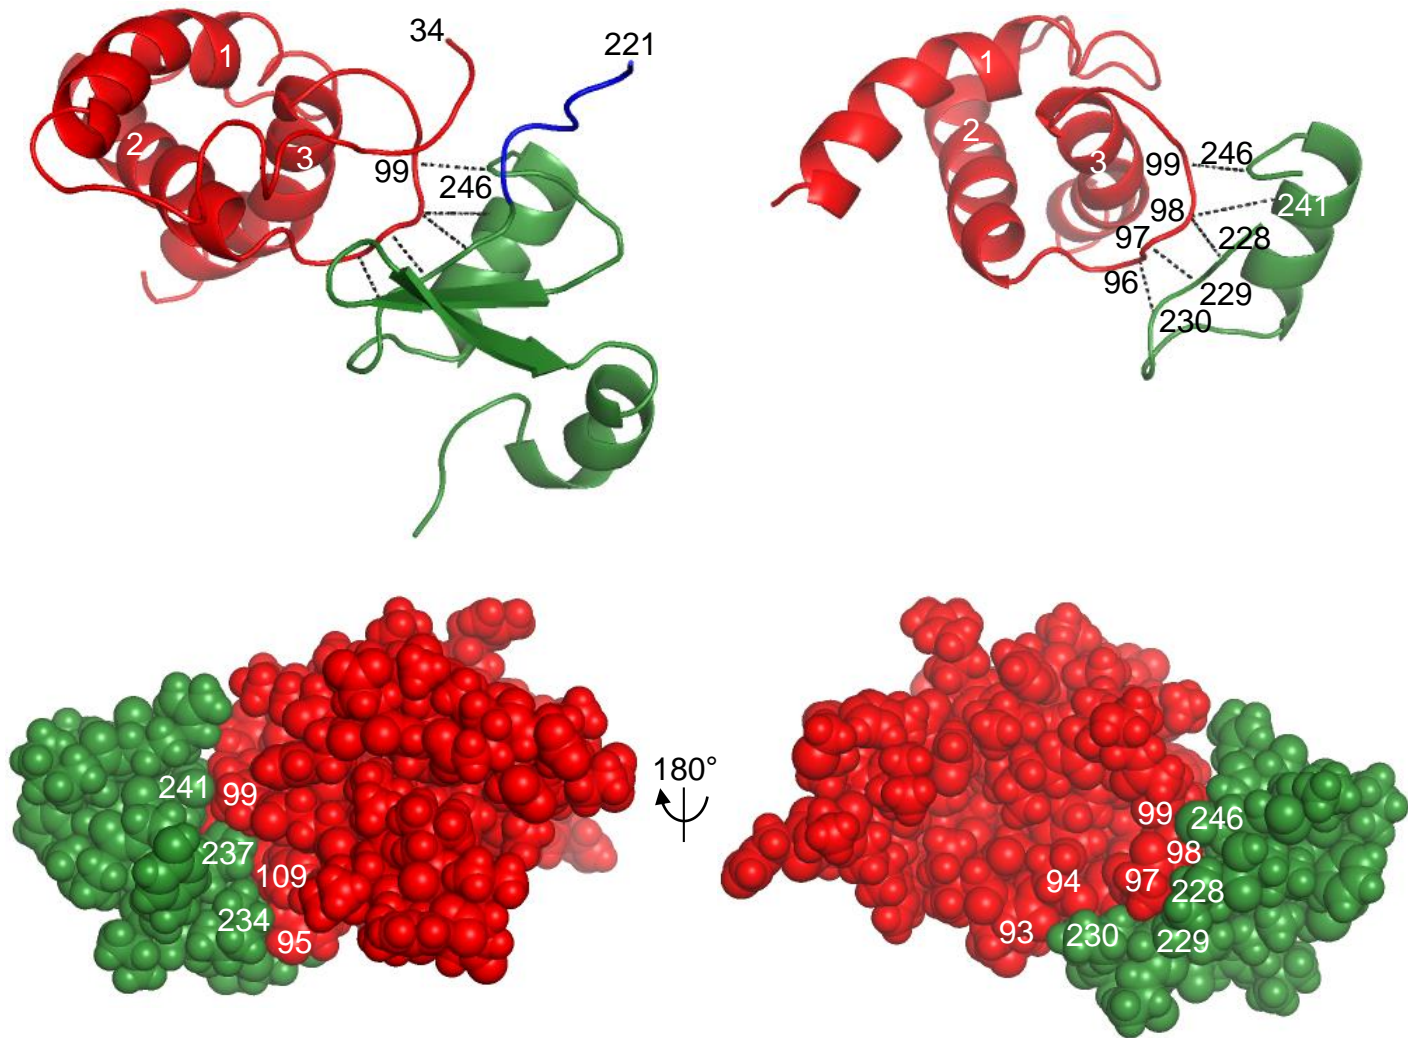

**Figure S11** Model of the interaction between the SpoIVFB CBS domain and residues 96-99 of Pro- $\sigma^K$ . The upper left panel shows the C chain of SpoIVFB and the Y chain of Pro- $\sigma^K$  as in the upper right panel of Figure S7. Dashed lines indicate points of proximity (5-7 Å in each case) between the chains (distance between C $\alpha$  atoms of indicated residues). The upper right panel shows a similar view rotated slightly, with residues 221-226 and 248 to the C-terminal end of SpoIVFB removed to better show the points of proximity. The lower right panel shows the same view with side chains added and space-filling atoms to illustrate packing. The lower left panel further illustrates packing.



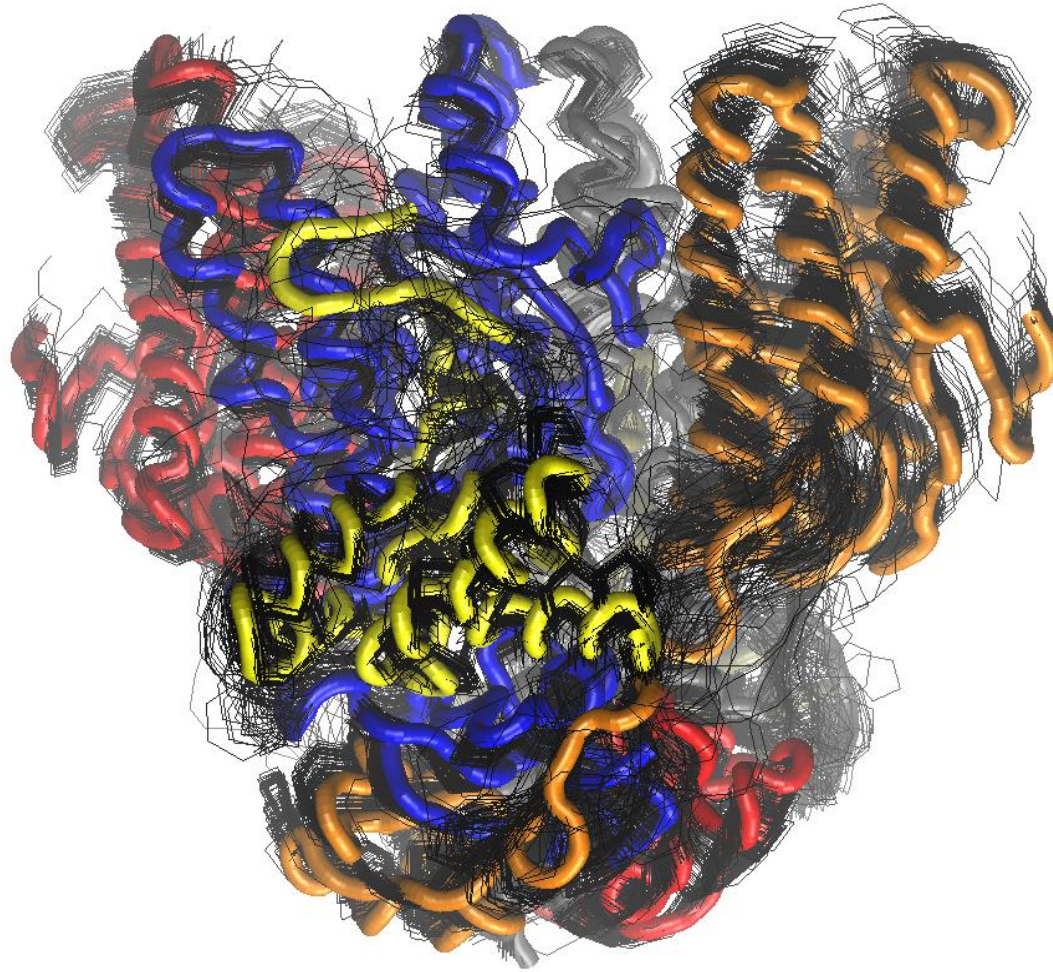

**Figure S12** Variation of C $\alpha$ -based models after restrained-based modeling (gray lines), and the model selected for further discussion (tubes colored by chains). In front is a chain of SpoIVFB (blue) interacting with a chain of Pro- $\sigma^K$  (yellow).
